# Supplementary material for: A Meta-analysis of Individual Participant Data Reveals an Association between Circulating Levels of IGF-I and Prostate Cancer Risk
Source: Oxford University Press journal article supplement (doi:10.1158/0008-5472.can-15-1551), 2016-02-26
Supplement: 00085472can151551-sup-149404_1_supp_0_8189k1.doc [file 00085472can151551-sup-149404_1_supp_0_8189k1.doc]

**Supplementary Tables and Figures**

**A meta-analysis of individual participant data reveals an association between circulating levels of IGF-I and prostate cancer risk**

**Correspondence to:** Ruth C. Travis DPhil, Endogenous Hormones, Nutritional Biomarkers and Prostate Cancer Collaborative Group, Cancer Epidemiology Unit, Nuffield Department of Population Health, University of Oxford, Richard Doll Building, Roosevelt Drive, Oxford OX3 7LF, UK.

Tel: +44 1865 289600

Fax: +44 1865 289610

Email: ruth.travis@ceu.ox.ac.uk

**Supplementary Table S**1. Study characteristics

| **Study (year)** | **Sample population** | **Location** | **Recruitment period** | **Prostate cancer ascertainment method** | **Nested case-control study characteristics** | |
| --- | --- | --- | --- | --- | --- | --- |
| **Ratio of case patients to control participants** | **Matching criteria and comments** |
| **Prospective Studies** |  |  |  |  |  |  |
| ATBC (2003) | Randomised trial of α-tocopherol and β-carotene among smokers | Finland | 1985-1993 | Cancer registry linkage, central review of medical records and specimens | 1:4 | Controls randomly selected from cohort |
| BLSA (2000) | Population-based cohort study of the physiology of aging | USA | 1958-onward | Self-report with medical record review | 1:2 | Age (±2 year); follow-up time |
| BUPA (2006) | Health plan members | UK | 1975-1982 | Cancer registry and death registry linkage | 1:3 | Age (±1 year); duration of storage of the serum sample (±1 year). Controls required to be alive and without a cancer notification at time of case selection |
| CHS (2005) | Population-based cohort study | USA | 1989-1993 | Cancer registry linkage or self-report with hospital discharge confirmation | 1:1 | Frequency matched by age (within 3 years); race; year of entry; year of blood draw; control participants survived to same age as case patient |
| CLUE 1 (2001) | Population-based cohort study | USA | 1974-onward | Cancer registry linkage | 1:2 | Age (±1 year); race; date of recruitment (±3 weeks) |
| EPIC  Phase 1 and Phase 2 ( 2007, 2012) | Population-based cohort study | Europe | 1991-2001 | Cancer registry linkage; health insurance record linkage; Self-report with medical record review | 1:1 except for the Umea centre which was 1:2 | Study centre; age at blood draw (±6 months); time of blood draw (±1 hour); time between blood draw and last consumption of food/drink (<3, 3-6, >6 hours); length of follow-up |
| ERSPC (2004) | Population-based randomized trial of PSA screening | The Nether-lands | 1991-2000 | Diagnosis as part of trial protocol | 1:1 | Age (per 1-year group); PSA level at first visit (<2, 2-3, 3-4 µg/L); postal code |
| HPFS  Phase 1 and Phase 2 (2005, 2010) | Cohort study of male dentists, optometrists, osteopathic physicians, podiatrists, pharmacists, and veterinarians | USA | 1986 | Self-report with medical record review | 1:1 | Year of birth (±1 year); date of recruitment (same year); time of blood collection (12 a.m.– 9 a.m., 9 a.m.–12 p.m., 12 p.m.–4 p.m., 4 p.m.–12 a.m.); PSA test before blood draw (y/n); season of blood draw; control participants had ≥1 screening PSA test after the date of blood draw |
| JACC (2010) | Population-based cohort study | Japan | 1988-1990 | Death certificate review | 1:3 | Study area; gender; age using baseline characteristics. All controls were alive, had not migrated, and were free of any cancer at the time of the matched case subject’s death |
| KPMCP (1998) | Health plan members | USA | 1964-1970 | Record linkage to tumour registry | 1:3 | Same age |
| MCCS (2006) | Population-based cohort study | Australia | 1990-1994 | Cancer registry linkage | Not matched: designed as a case-cohort study | Not matched: designed as a case-cohort study |
| MEC (2010) | Population-based cohort study | USA | 1993-1996  (Blood collection 2001-2006) | Cancer registry linkage | 1:2 | Geographical location (California/Hawaii); ethnicity; birth year (±1 year); date blood draw (±6 months); time blood draw (±2 hours); fasting status |
| NSHDC (2000, 2004) | Combination of a population-based intervention study to decrease cardiovascular disease and a population-based monitoring study of cardiovascular disease | Sweden | 1985-onward | Cancer registry linkage | 1:2 | Age (±6 months); date of recruitment (±2 months); town or area of residency |
| PCPT (2013) | Randomised, placebo-controlled trial of finasteride and prostate cancer | USA | 1994-1997 | Diagnosed as part of trial protocol. Annual digital rectal examinations and PSA measurements. Biopsy if abnormal DRE or reported PSA level > 4.0 ng per. End-of-study prostate biopsy | 1:1 | Frequency matched: age (5-year age groups); PCPT treatment arm; positive family history for first-degree relative with prostate cancer. Controls required to have completed end of study biopsy procedure and had no evidence of prostate cancer. |
| PHS (1998, 2002, 2010) | Randomised trial of aspirin and β-carotene among physicians | USA | 1982-onward | Self-report with medical record review | 1:1-3 | Age (±1 year and ±5 years for older men); smoking status (never, former, current); length of follow-up  (Included both placebo and treatment arms, not stated whether cases and controls were matched by intervention/placebo group) |
| PLCO (2007) | Population-based randomised controlled multicentre trial of methods for early detection of cancer of the prostate, lung, colorectum and ovary. | USA | 1993-2001 | Medical and pathology record review after screening and self-report with medical record review | 1:1 frequency matched | Age at cohort entry (5-year intervals); time since initial screening (1-year time window); and calendar year of cohort entry. All study participants selected from trial screening arm, i.e. offered PSA at recruitment and annually for 5 yrs, plus DRE at recruitment and annually for three years. |
| SU.VI.MAX (2005) | Population-based, double-blind, placebo-controlled, randomized trial of supplementation with antioxidant vitamins and minerals (vitamin C, α-tocopherol, β-carotene, selenium, and zinc) | France | 1994 | Self-reported in a monthly questionnaire on health-related events or detected through PSA screening of baseline bloods analysed at the end of trial. PSA values PSA ≥ 4.0 μg/L were followed up at participant’s treating physician. | 1:4 | Same age  (All men randomized in the study were eligible) |
| **Cross-sectional Studies** | |  |  |  |  |  |
| ProtecT -Feasibility Phase (2004) | Cross-sectional study within the first phase of population-based PSA testing and randomised, controlled trial of treatments of localised prostate cancer | United Kingdom | 1999-2002 | Diagnosed as part of trial protocol. PSA test at recruitment followed by diagnostic biopsy if PSA ≥3ng/mL | 1:1 stratum matched | 2-year aged-band (age at PSA test); closest calendar date; GP/family practice  (Controls had PSA below threshold [for first 12 months of study <3ng/ml or <4ng/ml if aged over 60 years, and thereafter PSA<ng/ml] or PSA above the threshold combined with at least 1 negative biopsy). |
| ProtecT (2012) | Cross-sectional study within a population-based PSA testing and randomised, controlled trial of treatments of localised prostate cancer | United Kingdom | 2002-2009 | Diagnosed as part of trial protocol. PSA test at recruitment followed by diagnostic biopsy if PSA ≥3ng/mL | 1:1 stratum matched | 5-year aged-band (age at PSA test); GP/family practice; time and season of blood draw due to timing of recruitment clinic. No overlap in study period with feasibility phase of ProtecT. (Controls had PSA<3ng/ml or raised PSA ≥3.0 ng/ml combined with at least 1 negative biopsy). Due to variation in measurements between assay kits, values are pre-adjusted for assay kit, age and sample storage time. |
| Abbreviations: ATBC, Alpha-Tocopherol Beta-Catotene Cancer Prevention Study; BLSA, Baltimore Longitudinal Study of Aging; CHS, Cardiovascular Health Study; BUPA, British United Provident Association Study; CLUE, Campaign Against Cancer and Stroke (“Give Us a Clue to Cancer”) Study; EPIC, European Prospective Investigation into Cancer and Nutrition; ERSP, European Randomized Study of Screening for Prostate Cancer; HPFS, Health Professionals Follow-up Study; JACC, Japan Collaborative Cohort Study; KPMCP, Kaiser Permanente Medical Care Program; MCCS, Melbourne Collaborative Cohort Study; MEC, Multiethnic Cohort; NSHDC, Northern Sweden Health and Disease Cohort; PCPT, Prostate Cancer Prevention Trial; PHS, Physicians Health Study; PLCO, Prostate, Lung, Colorectal, and Ovarian Cancer Screening Trial; ProtecT, Prostate Testing for Cancer and Treatment Study; PSA, prostate-specific antigen; SU.VI.MAX, SUpplémentation en VItamines et Minéraux AntioXydants. | | | | | | |
|

**Supplementary Table S2. Assay details for IGF-I, IGF-II, IGFBP-1, IGFBP-2 and IGFBP-3 measurements**

| **Study (year)** | **Sample** | **IGF-I** |  |  |  | **IGF-II** |  | |  |  | **IGFBP-1** |  |  |
| --- | --- | --- | --- | --- | --- | --- | --- | --- | --- | --- | --- | --- | --- |
|  |  | **Method (Manufacturer/ Laboratory)** | **Intra-assay CV** | **Inter-assay CV** |  | **Method (Manufacturer/ Laboratory)** | **Intra-assay CV** | | **Inter-assay CV** |  | **Method (Manufacturer/ Laboratory)** | **Intra-assay CV** | **Inter-assay CV** |
| **Prospective Studies** |  |  |  | |  |  |  | |  |  |  |  |  |
| ATBC (2003) | Serum | ELISA (Diagnostic Systems Laboratories, Webster, Texas) | 6.6% overall CV | |  | NA |  | |  |  | NA |  |  |
| BLSA (2000, 2004) | Serum | RIA (Endocrine Sciences, Calabasas Hills, California) | 4.6% to 20% | 9.0% to 10% |  | RIA (Endocrine Sciences, Calabasas Hills, California) | 4.9% to 9.6% | | 5.1% to 30% |  | NA |  |  |
| BUPA (2006) | Serum | ELISA (Diagnostic Systems Laboratories, Webster, Texas) | Not given | Not given |  | ELISA (Diagnostic Systems Laboratories, Webster, Texas) | Not given | | Not given |  | NA |  |  |
| CHS (2005) | EDTA plasma | IRMA (Diagnostic Systems Laboratories, Webster, Texas) | 3.0% to 3.8% | 6.6% to 12.3% |  | NA |  | |  |  | NA |  |  |
| CLUE 1 (2001) | Serum | ELISA (Diagnostic Systems Laboratories, Webster, Texas) | Not given | Not given |  | Not published |  | |  |  | Not published |  |  |
| EPIC (2007, 2012) | Serum | ELISA (Diagnostic Systems Laboratories, Webster, Texas, phase 1 and phase 2 excluding Swedish samples)  IDS-iSYS (Immuno-diagnostic Systems Ltd, Swedish samples for phase 2) | 3.0% (phase 1)  4.4% (phase 2) | 13.7% (phase 1)  3.2% (phase 2) |  | Not published |  | |  |  | Not published |  |  |
| ERSPC (2004) | Serum | IRMA (Diagnostic Systems Laboratories, Webster, Texas) | 3.4% | Not given |  | NA |  | |  |  | NA |  |  |
| HPFS (2005, 2010) | Plasma | ELISA (Diagnostic Systems Laboratories, Webster, Texas) | <10% (batch 1998 to 2000, CV=13%). | Not given |  | NA |  | |  |  | Not published |  |  |
| JACC (2010) | Serum | IRMA (Daiichi Radioisotope Lab, Tokyo, Japan) | 2.1% to 3.5% | Not given |  | IRMA (Daiichi Radioisotope Lab, Tokyo, Japan) | 2.7% to 4.4% | | Not given |  | NA |  |  |
| KPMCP (1998) | Serum | RIA (Nichols Institute Diagnostics, San Clemente, California) | Not given | Not given |  | NA |  | |  |  | NA |  |  |
| MCCS (2006) | Plasma | ELISA (Diagnostic Systems Laboratories, Webster, Texas) | Not given | 11.1% |  | NA |  | |  |  | NA |  |  |
| MEC (2010) | Serum | ELISA (Diagnostic Systems Laboratories, Webster, Texas) | 2.1% | Not given |  | ELISA (Diagnostic Systems Laboratories, Webster, Texas) | 1.8% | | Not given |  | ELISA (Diagnostic Systems Laboratories, Webster, Texas) | 2.2% | Not given |
| NSHDC (2000, 2004) | Plasma | IRMA (Immunotech, Marseille, France) | 8.6% to 11.0% | 13.8% |  | NA |  | |  |  | IRMA (Diagnostic Systems Laboratories, Webster, Texas) | 2.9% | Not given |
| PCPT (2013) | Serum | ELISA (Diagnostic Systems Laboratories, Webster, Texas) | Coefficients of variation 5.3% and 7.1% for 2 sets of controls | |  | ELISA (Diagnostic Systems Laboratories, Webster, Texas) | Coefficients of variation 4.2% and 5.0% for 2 sets of controls | | |  | NA |  |  |
| PHS (1998, 2002, 2010) | Plasma | ELISA (Diagnostic Systems Laboratories, Webster, Texas) | 4.9% to 6.5% | Not given |  | ELISA (Diagnostic Systems Laboratories, Webster, Texas) | Not given | Not given | |  | Not published |  |  |
| PLCO (2007) | Serum | ELISA (Diagnostic Systems Laboratories, Webster, Texas) | 9% overall coefficient of variation | |  | NA |  |  | |  | NA |  |  |
| SU.VI.MAX (2005) | Plasma | Chemiluminescence (Diagnostic Products, Los Angeles, California) | 5.3% (type of CV not reported) |  |  | IRMA (Immunotech, Marseille, France) | 6.8% (type of CV not reported) | | |  | NA |  |  |
| **Cross-sectional studies** | |  |  |  |  |  |  |  | |  |  |  |  |
| ProtecT -Feasibility Phase (2004) | Serum | ELISA (Diagnostic Systems Laboratories, Webster, Texas) | 3% | 15% |  | ELISA (Diagnostic Systems Laboratories, Webster, Texas) | 5% | 26% | |  | NA |  |  |
| ProtecT (2012) | Serum | RIA (Professor Holly, in house assay) | ICC 0.86 | ICC 0.66 |  | RIA (Professor Holly, in house assay) | ICC 0.91 | 0.84 | |  | NA |  |  |

For expansion of study names see Table 1.

Abbreviations: CV, coefficient of variation; EDTA, Ethylenediaminetetraacetic acid; EIA, enzyme immunoassay; IA, immunoassay, type unspecified; MS, mass spectrometry; NK, not known; RIA, radioimmunoassay; RRA, radioreceptor assay.

**a**Cases and controls were assayed in the same batch

**Supplementary Table S2 (continued). Assay details for IGF-I, IGF-II, IGFBP-1, IGFBP-2 and IGFBP-3 measurements**

| **Study (year)** | **IGFBP-2** |  | |  |  | **IGFBP-3** |  |  | **Blinded** | **Same batcha** |
| --- | --- | --- | --- | --- | --- | --- | --- | --- | --- | --- |
|  | **Method (Manufacturer/ Laboratory)** | **Intra-assay CV** | | **Inter-assay CV** |  | **Method (Manufacturer/ Laboratory)** | **Intra-assay CV** | **Inter-assay CV** |  |  |
| **Prospective Studies** |  |  | |  |  |  |  | |  |  |
| ATBC (2003) | NA |  | |  |  | ELISA (Diagnostic Systems Laboratories, Webster, Texas) | 7.3% overall CV | | Not given | Yes |
| BLSA (2000, 2004) | NA |  | |  |  | RIA (Endocrine Sciences, Calabasas Hills, California) | 5.1% to 13% | 5.5% to 17% | Not given | Not given |
| BUPA (2006) | NA |  | |  |  | ELISA (Diagnostic Systems Laboratories, Webster, Texas) | Not given | Not given | Yes | Yes |
| CHS (2005) | NA |  | |  |  | IRMA (Diagnostic Systems Laboratories, Webster, Texas) | 2.1% to 5.8% | 4.1% to 7.1% | Not given | Not given |
| CLUE 1 (2001) | NA |  | |  |  | ELISA (Diagnostic Systems Laboratories, Webster, Texas) | Not given |  | Yes | Yes |
| EPIC (Allen, 2007, Price 2012) | Not published |  | |  |  | ELISA (Diagnostic Systems Laboratories, Webster, Texas) | 5.3% | 9.4% | Yes | Yes |
| ERSPC (2004) | NA |  |  | |  | IRMA (Diagnostic Systems Laboratories, Webster, Texas) | 3.9% | Not given | Yes | Yes |
| HPFS (2005, 2010) | NA |  | |  |  | ELISA (Diagnostic Systems Laboratories, Webster, Texas) | <10% |  | Yes | Yes |
| JACC (2010) | NA |  | | |  | IRMA (Daiichi Radioisotope Lab, Tokyo, Japan) | 3.1% to 4.2% | Not given | Yes | Not given |
| KPMCP (1998) | NA |  | |  |  | NA |  |  | Not given | Not given |
| MCCS (2006) | NA |  | |  |  | ELISA (Diagnostic Systems Laboratories, Webster, Texas) | 9.5% coefficient of variation unspecified | | Yes | Random assignment to batch, proportions of cases and controls were approximately equal for all batches |
| MEC (2010) | NA |  | |  |  | ELISA (Diagnostic Systems Laboratories, Webster, Texas) | 2.5% | Not given | Not given | Not given |
| NSHDC (2000, 2004) | RIA (Diagnostic Systems Laboratories, Webster, Texas) | 2.5% | | Not given |  | IRMA (Immunotech, Marseille, France) | 3.6% to 4.9% | 5.9% to 6.9% | Yes | Yes |
| PCPT (2013) | ELISA (Diagnostic Systems Laboratories, Webster, Texas) | Coefficients of variation 5.5% and 8.9% for 2 sets of controls | | |  | ELISA (Diagnostic Systems Laboratories, Webster, Texas) | Coefficients of variation 4.2% and 4.8% for 2 sets of controls | | Yes | Not given |
| PHS (1998, 2002, 2010) | NA |  | |  |  | ELISA (Diagnostic Systems Laboratories, Webster, Texas) | 7.0% to 9.0% | Not given | Not given | Not given |
| PLCO (2007) | NA |  | |  |  | ELISA (Diagnostic Systems Laboratories, Webster, Texas) | 9% overall coefficient of variation | | Not given | Yes |
| SU.VI.MAX (2005) | RIA (Diagnostic Systems Laboratories, Webster, Texas) | 8.6% (type of CV not reported) | | |  | Chemiluminescence (Diagnostic Products, Los Angeles, California) | 6.3% (type of CV not reported) | | Yes | Not given |
| **Cross-sectional Studies** |  |  | |  |  |  |  |  |  |  |
| ProtecT -Feasibility Phase (2004) | RIA (Diagnostic Systems Laboratories, Webster, Texas) | 5% | | 14% |  | RIA in-house | 4% | 14% | Yes | Yes |
| ProtecT (2012) | ELISA (Diagnostic Systems Laboratories) | ICC 0.95 | | ICC 0.81 |  | RIA (Professor Holly, in house assay) | ICC 0.88 | ICC 0.71 | Yes | 79% |

**Supplementary Table S3. Geometric mean (95% confidence interval) hormone and binding protein concentrationsa by study and case-control status**

| **Study** | **Case-control status** | **Geometric mean concentration (95% CI)** | | | | |
| --- | --- | --- | --- | --- | --- | --- |
|  | **IGF-I, nmol/L** | **IGF-II, nmol/L** | **IGFBP-1, nmol/L** | **IGFBP-2, nmol/L** | **IGFBP-3, nmol/L** |
| **Prospective Studies** | |  |  |  |  |  |
| ATBC | Case | 18.0 (16.8-19.3) | N/A | N/A | N/A | 83.9 (79.2-89.0) |
|  | Control | 17.7 (17.0-18.4) | N/A | N/A | N/A | 79.0 (76.5-81.5) |
| BLSA | Case | 17.9 (15.9-20.1) | 22.6 (17.7-28.9) | N/A | N/A | 97.3 (90.4-104.8) |
|  | Control | 17.8 (16.7-19.0) | 40.9 (37.2-44.9) | N/A | N/A | 94.7 (90.1-99.6) |
| BUPA | Case | 15.2 (13.8-16.8) | 93.0 (89.2-97.0) | N/A | N/A | 99.9 (95.5-104.5) |
|  | Control | 15.0 (14.2-15.8) | 89.7 (87.5-92.0) | N/A | N/A | 95.2 (92.1-98.3) |
| CHS | Case | 18.2 (16.9-19.5) | N/A | N/A | N/A | 103.8 (99.2-108.6) |
|  | Control | 19.2 (17.9-20.6) | N/A | N/A | N/A | 108.2 (103.7-112.9) |
| CLUE 1 | Case | 14.7 (12.8-16.9) | 64.4 (58.2-71.4) | 0.15 (0.09-0.24) | N/A | 35.1 (31.5-39.1) |
|  | Control | 14.7 (13.4-16.1) | 66.9 (61.9-72.4) | 0.17 (0.13-0.23) | N/A | 34.6 (32.2-37.1) |
| EPIC Phase 1 | Case | 22.0 (21.3-22.6) | N/A | N/A | N/A | 129.9 (127.7-132.2) |
|  | Control | 21.2 (20.5-21.9) | N/A | N/A | N/A | 128.6 (126.4-130.9) |
| EPIC Phase 2 | Case | 19.8 (19.5-20.1) | 115.1 (112.5-117.6) | 0.22 (0.20-0.24) | 11.4 (10.9-11.8) | N/A |
|  | Control | 19.0 (18.7-19.3) | 111.5 (109.0-114.1) | 0.24 (0.22-0.26) | 11.4 (10.9-11.8) | N/A |
| ERSPC | Case | 16.3 (15.4-17.2) | N/A | N/A | N/A | 123.4 (120.1-126.9) |
|  | Control | 16.3 (15.4-17.3) | N/A | N/A | N/A | 125.1 (121.1-129.3) |
| HPFS Phase 1 | Case | 23.5 (22.9-24.0) | N/A | N/A | N/A | 116.6 (114.0-119.2) |
|  | Control | 22.2 (21.7-22.8) | N/A | N/A | N/A | 112.1 (109.4-114.8) |
| HPFS Phase 2 | Case | 28.1 (27.5-28.7) | N/A | 0.63 (0.58-0.67) | N/A | 130.4 (128.1-132.8) |
|  | Control | 27.2 (26.5-27.8) | N/A | 0.65 (0.60-0.69) | N/A | 126.7 (124.2-129.3) |
| JACC | Case | 12.0 (8.8-16.2) | 71.0 (65.8-76.5) | N/A | N/A | 94.0 (85.2-103.8) |
|  | Control | 12.9 (11.2-14.9) | 68.4 (65.3-71.8) | N/A | N/A | 89.8 (84.8-95.2) |
| KPMCP | Case | 20.2 (18.3-22.4) | N/A | N/A | N/A | N/A |
|  | Control | 20.6 (19.8-21.5) | N/A | N/A | N/A | N/A |
| MCCS | Case | 21.8 (21.1-22.5) | N/A | N/A | N/A | 105.0 (102.8-107.2) |
|  | Control | 21.8 (21.3-22.3) | N/A | N/A | N/A | 103.6 (102.0-105.2) |
| MEC | Case | 23.5 (22.8-24.3) | 117.6 (114.3-121.1) | 0.73 (0.66-0.80) | N/A | 137.3 (133.8-141.0) |
|  | Control | 22.9 (22.4-23.5) | 114.3 (111.8-116.8) | 0.74 (0.69-0.79) | N/A | 132.1 (129.3-134.9) |
| NSHDC | Case | 26.4 (25.1-27.8) | N/A | 1.23 (1.08-1.39) | 17.5 (15.7-19.5) | 83.3 (81.1-85.6) |
|  | Control | 25.3 (24.4-26.1) | N/A | 1.33 (1.22-1.44) | 16.5 (15.0-18.2) | 80.1 (78.4-81.9) |
| PCPT | Case | 26.4 (25.9-26.9) | 228.4 (225.0-231.9) | N/A | 15.3 (14.8-15.8) | 139.2 (137.1-141.3) |
|  | Control | 26.1 (25.6-26.6) | 223.9 (220.4-227.5) | N/A | 14.0 (13.5-14.5) | 136.7 (134.6-138.9) |
| PHS | Case | 23.0 (22.4-23.6) | 66.4 (62.9-70.2) | 0.14 (0.13-0.16) | N/A | 108.3 (106.4-110.2) |
|  | Control | 22.7 (22.1-23.3) | 66.5 (63.8-69.4) | 0.16 (0.14-0.18) | N/A | 107.8 (105.7-109.8) |
| PLCO | Case | 25.2 (24.4-26.0) | N/A | N/A | N/A | 155.2 (152.2-158.2) |
|  | Control | 24.9 (24.2-25.6) | N/A | N/A | N/A | 155.3 (152.7-157.9) |
| SU.VI.MAX | Case | 19.4 (18.4-20.5) | 141.3 (136.1-146.7) | N/A | 6.3 (5.5-7.3) | 139.8 (134.9-144.9) |
|  | Control | 18.7 (18.1-19.3) | 142.4 (139.6-145.3) | N/A | 6.5 (6.1-7.0) | 142.6 (139.5-145.8) |
| **Cross-sectional Studies** | |  |  |  |  |  |
| ProtecT feas. | Case | 17.1 (16.5-17.7) | 65.8 (63.2-68.5) | N/A | 13.4 (11.8-15.2) | 120.5 (116.6-124.6) |
|  | Control | 16.3 (16.0-16.7) | 56.7 (55.5-58.0) | N/A | 15.5 (14.6-16.5) | 109.8 (107.7-112.0) |
| ProtecT main | Case | 20.4 (20.1-20.7) | 100.8 (99.6-102.0) | N/A | 18.8 (18.4-19.3) | 155.4 (154.0-156.7) |
|  | Control | 20.4 (20.1-20.6) | 97.3 (96.1-98.4) | N/A | 18.1 (17.6-18.5) | 148.3 (146.8-149.9) |

**a**Geometric means (95% confidence intervals) for all cases and controls who are in complete matched case control sets and have measurements available for each analyte. For expansion of study names see Table 1. Abbreviations: N/A, data not available for this study.

**Supplementary Table S4. Partial coefficients among controls between log-transformed concentrations of circulating hormones, binding proteins and other analytes, standardized within each study and adjusted for age at blood collection (5 age-groups).**

|  | **IGF-I** | **IGF-II** | **IGFBP-1** | **IGFBP-2** | **IGFBP-3** |
| --- | --- | --- | --- | --- | --- |
| **IGF-II** | **0.40†** | - | - | - | - |
| **IGFBP-1** | **-0.13** b | **-0.16** b | - | - | - |
| **IGFBP-2** | **-0.09** b | **-0.20** b | **0.44** b | - | - |
| **IGFBP-3** | **0.57** b | **0.62** b | **-0.11** b | **-0.17** b | - |
| **SHBG** | **-0.13** b | **-0.26** b | **0.32** b | **0.42** b | **-0.26** b |
| **Testosterone** | 0.004 | **-0.13** b | **0.31** b | **0.32** b | **-0.08** b |
| **Free testosterone** | **0.11** b | 0.03 | **0.19** b | **0.09** b | **0.12** b |
| **Estradiol** | -0.03 | **-0.11** b | <10 observations | 0.07 a | -0.02 |
| **Free Estradiol** | 0.05a | 0.04 | <10 observations | **-0.15** b | **0.14** b |
| **Insulin** | -0.008 | -0.08 a | **-0.49** b | **-0.39** b | -0.03 |
| **C-peptide** | 0.05a | 0.07 a | **-0.47** b | **-0.20** b | **0.08** b |

aTwo -sided significance level *P* <0.05

bTwo-sided significance level *P* <0.001

**Supplementary Table S5. Odds ratios for prostate cancer associated with a doubling (rather than and 80 percentile increase as presented elsewhere) of concentration of IGFs among cases and their matched controls in all studies and in prospective studies**

|  | **All studies** | |  | **Prospective Studies** | |
| --- | --- | --- | --- | --- | --- |
|  | **OR (95% CI)** | ***P* trend** |  | **OR (95% CI)** | ***P* trend** |
| **IGF-I** | 1.12 (1.06-1.18) | <0.001 |  | 1.16 (1.09-1.23) | <0.001 |
| **IGF-II** | 1.21 (1.11-1.32) | <0.001 |  | 1.04 (0.92-1.18) | 0.551 |
| **IGFBP-1** | 0.96 (0.93-1.00) | 0.032 |  | 0.96 (0.93-1.00) | 0.032 |
| **IGFBP-2** | 1.07 (1.02-1.11) | 0.003 |  | 1.10 (1.02-1.19) | 0.009 |
| **IGFBP-3** | 1.39 (1.28-1.51) | <0.001 |  | 1.27 (1.16-1.40) | <0.001 |

**Supplementary Table S6. Odds ratios for prostate cancer by study-specific deciles of concentration of IGF-I and IGFBP-3 among cases and their matched controls in prospective studies**

|  | **IGF-I** | **IGFBP-3** |
| --- | --- | --- |
|  | **OR (95% CI)** | **OR (95% CI)** |
| **Decile** |  |  |
| **1** | 1 (reference) | 1 (reference) |
| **2** | 1.12 (0.97- 1.28) | 1.18 (1.01- 1.37) |
| **3** | 1.13 (0.99- 1.31) | 1.27 (1.09- 1.47) |
| **4** | 1.09 (0.94- 1.25) | 1.26 (1.08- 1.46) |
| **5** | 1.20 (1.05- 1.38) | 1.38 (1.18- 1.60) |
| **6** | 1.16 (1.00- 1.33) | 1.26 (1.08- 1.47) |
| **7** | 1.28 (1.12- 1.48) | 1.28 (1.10- 1.49) |
| **8** | 1.23 (1.07- 1.42) | 1.34 (1.15- 1.57) |
| **9** | 1.30 (1.13- 1.50) | 1.33 (1.14- 1.56) |
| **10** | 1.43 (1.24-1.65) | 1.39 (1.19-1.63) |
| ***P* for trend** | <0.001 | <0.001 |

**Supplementary Table S7. Odds ratios for prostate cancer associated with an 80 percentile increase in IGF concentration for selected pairs of IGFs, with mutual adjustment, among cases and their matched controls in prospective studies**

|  | **OR (95% CI)** | ***P* trend** | **Number of studies** |
| --- | --- | --- | --- |
| IGF alone | 1.29 (1.17-1.41) | <0.001 | 19 |
| IGF-I adjusted for IGF-II | 1.19 (1.00-1.42) | 0.048 | 9 |
| IGF-I adjusted for IGFBP-1 | 1.33 (1.11-1.58) | 0.002 | 6 |
| IGF-I adjusted for IGFBP-2 | 1.36 (1.13-1.63) | 0.001 | 4 |
| IGF-I adjusted for IGFBP-3 | 1.18 (1.04-1.33) | 0.008 | 17 |
| IGF-I adjusted for testosterone | 1.26 (1.11-1.42) | <0.001 | 8 |
| IGF-I adjusted for SHBG | 1.22 (1.08-1.38) | 0.001 | 8 |
| IGF-II alone | 1.19 (1.01-1.39) | 0.038 | 9 |
| IGF-II adjusted for IGF-I | 1.09 (0.91-1.30) | 0.4 | 9 |
| IGF-II adjusted for IGFBP-3 | 0.97 (0.73-1.29) | 0.8 | 8 |
| IGF-II adjusted for testosterone | 1.20 (0.98-1.47) | 0.084 | 4 |
| IGF-II adjusted for SHBG | 1.19 (0.97-1.47) | 0.1 | 4 |
| IGFBP-1 alone | 0.85 (0.73-1.00) | 0.053 | 6 |
| IGFBP-1 adjusted for IGF-I | 0.90 (0.76-1.06) | 0.2 | 6 |
| IGFBP-1 adjusted for testosterone | 0.98 (0.70-1.38) | 0.9 | 2 |
| IGFBP-1 adjusted for SHBG | 1.00 (0.71-1.39) | 1.0 | 2 |
| IGFBP-2 alone | 1.17 (1.05-1.31) | 0.005 | 4 |
| IGFBP-2 adjusted for IGF-I | 1.35 (1.13-1.62) | 0.001 | 4 |
| IGFBP-2 adjusted for testosterone | 1.71 (1.29-2.25) | <0.001 | 1 |
| IGFBP-2 adjusted for SHBG | 1.85 (1.39-2.48) | <0.001 | 1 |
| IGFBP-3 alone | 1.21 (1.09-1.34) | <0.001 | 17 |
| IGFBP-3 adjusted for IGF-I | 1.09 (0.96-1.24) | 0.2 | 17 |
| IGFBP-3 adjusted for IGF-II | 1.17 (0.88-1.55) | 0.3 | 8 |
| IGFBP-3 adjusted for testosterone | 1.28 (1.13-1.46) | <0.001 | 8 |
| IGFBP-3 adjusted for SHBG | 1.25 (1.09-1.42) | 0.001 | 8 |

**Supplementary Table S8. Odds ratios for prostate cancer by study-specific thirds of concentration of IGF-I and IGFBP-3, among cases and their matched controls in prospective studies**

|  |  | **Odds ratio (95% confidence interval)** | | |
| --- | --- | --- | --- | --- |
|  |  | **Third of IGF-I** |  |  |
|  |  | **1** | **2** | **3** |
| **Third of IGFBP-3** | **1** | 1 (reference) | 1.06 (0.93- 1.22) | 1.11 (0.90- 1.37) |
|  | **2** | 1.16 (1.02- 1.33) | 1.15 (1.03- 1.29) | 1.16 (1.02- 1.32) |
|  | **3** | 1.17 (0.95- 1.43) | 1.11 (0.97- 1.26) | 1.26 (1.13- 1.40) |
| ***P* for interaction** |  | 0.6 |  |  |

**Supplementary Figure S1. Odds ratios for prostate cancer associated with an 80 percentile increase in IGF-II among all cases and their matched controls.**


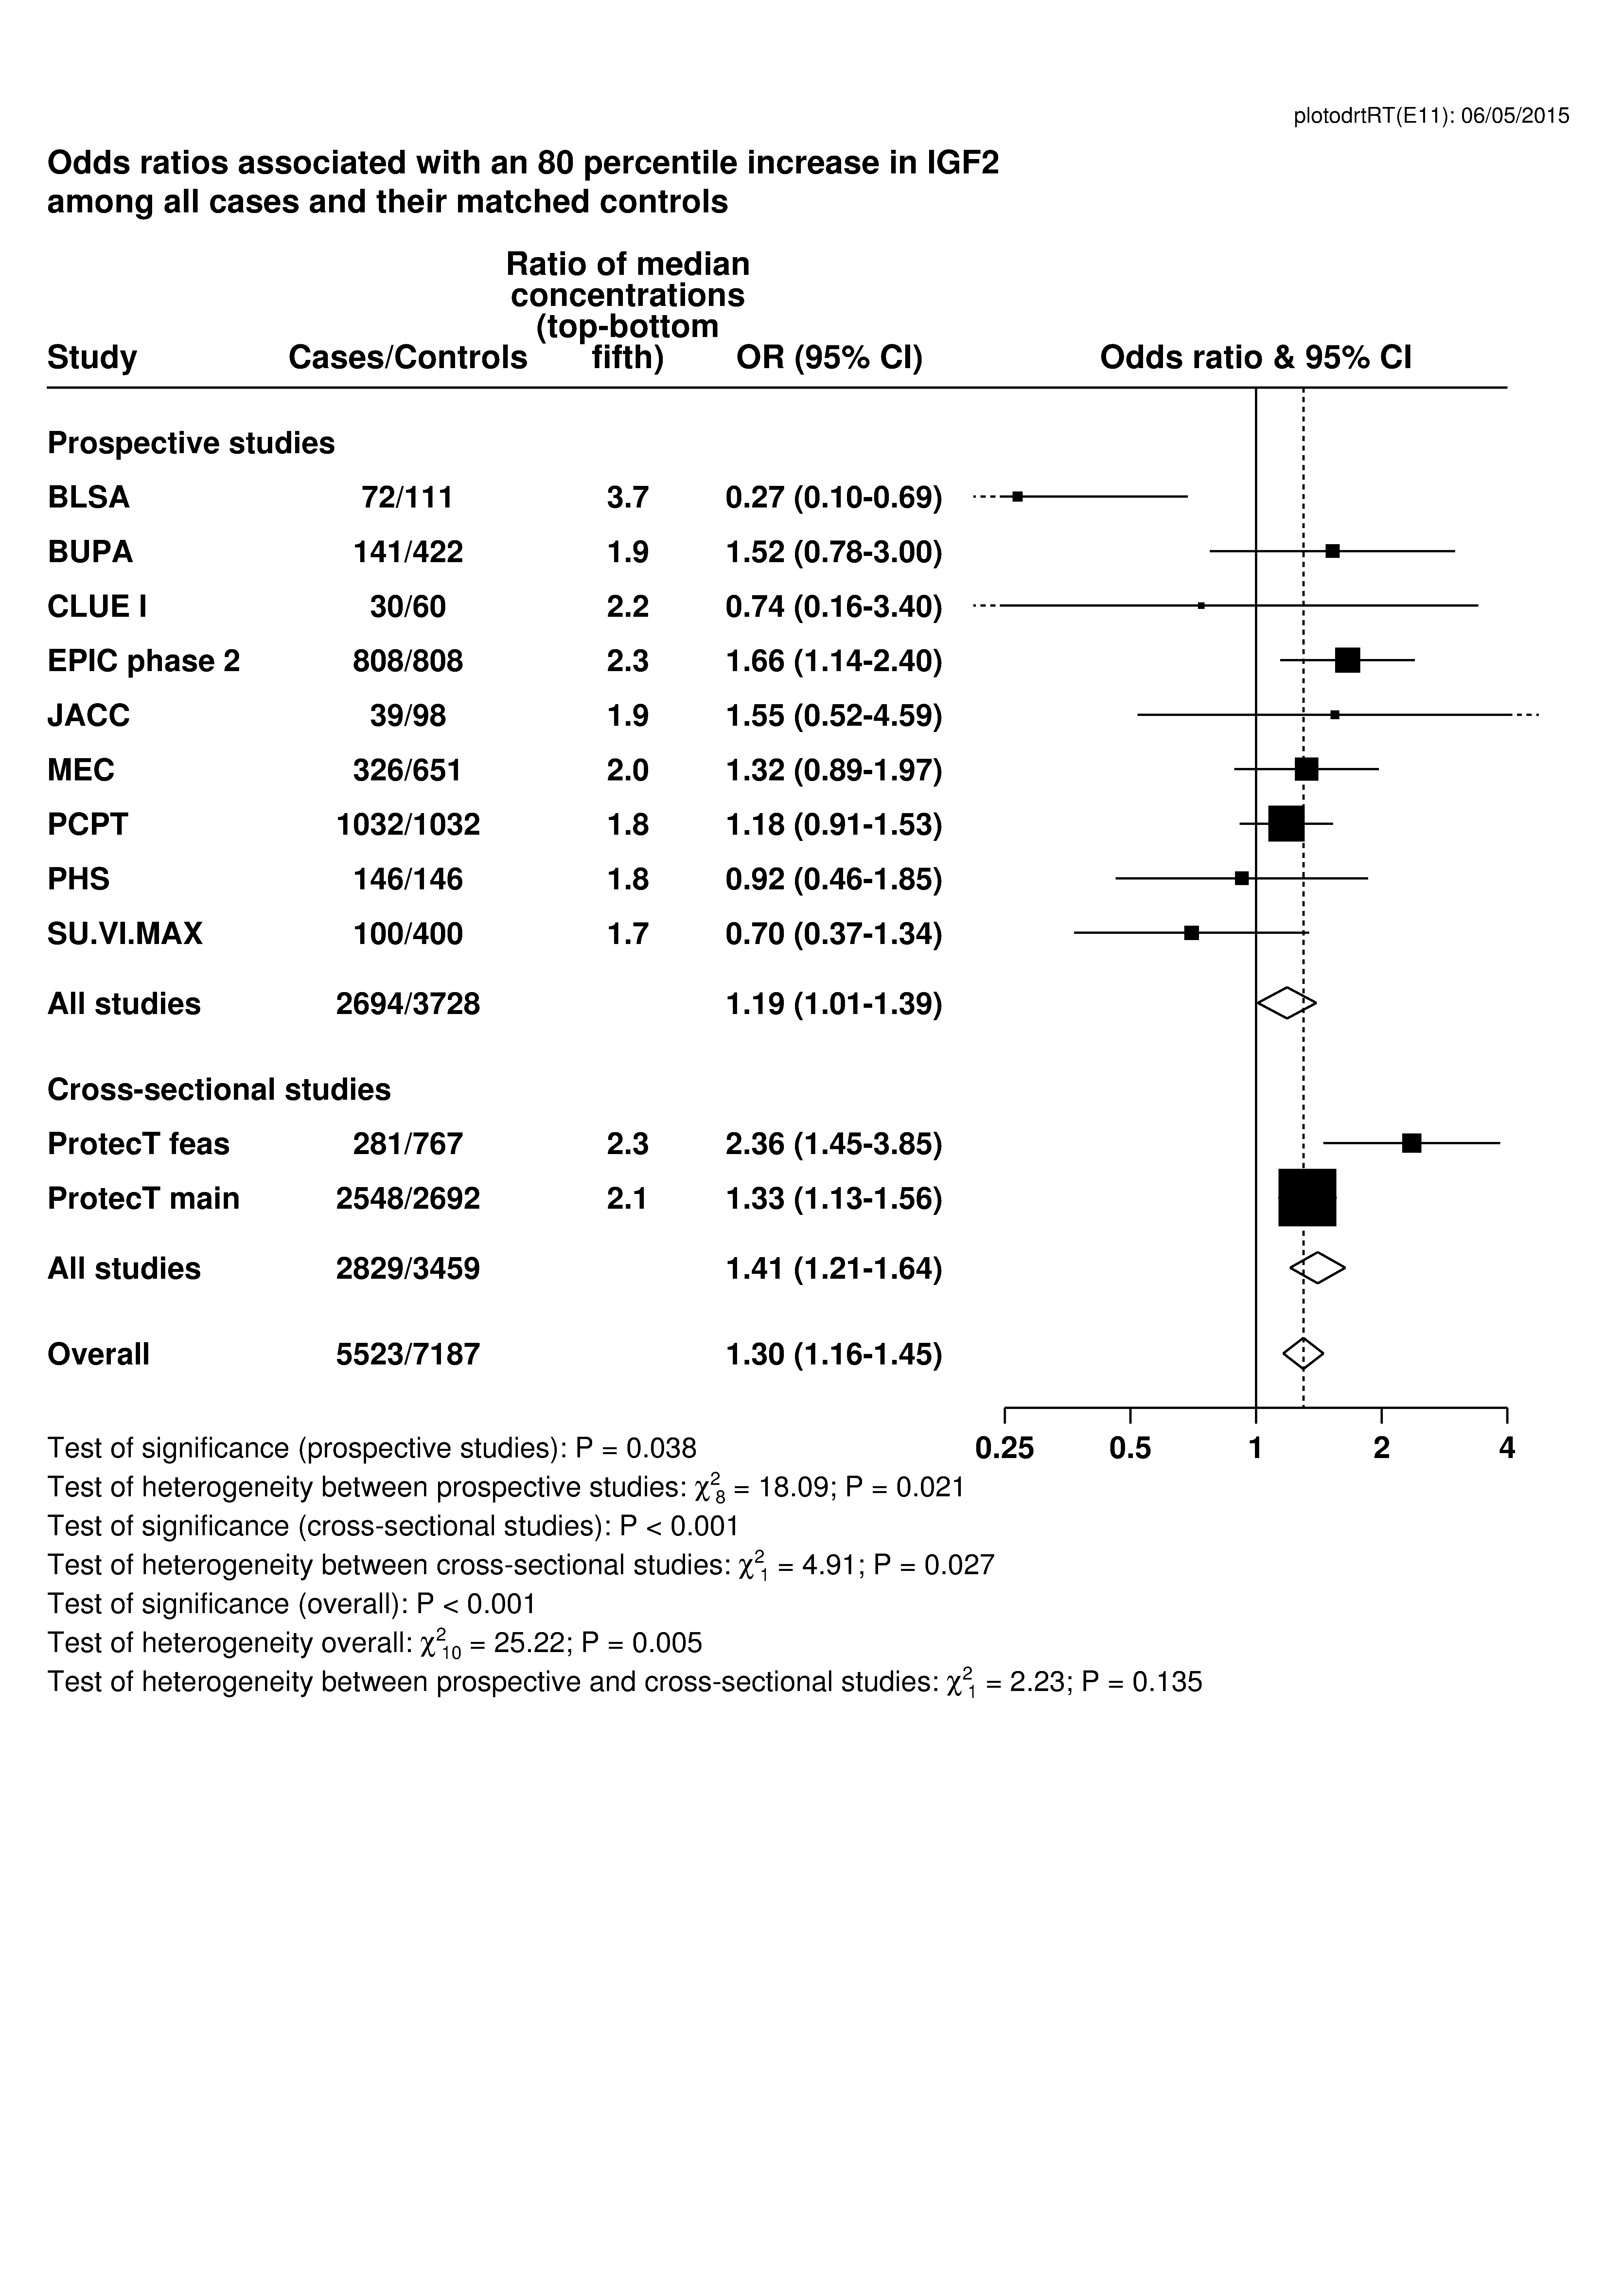


**Supplementary Figure S2. Odds ratios for prostate cancer associated with an 80 percentile increase in IGFBP-1 among all cases and their matched controls (data are only available from prospective studies and not the cross-sectional PSA screening studies).**


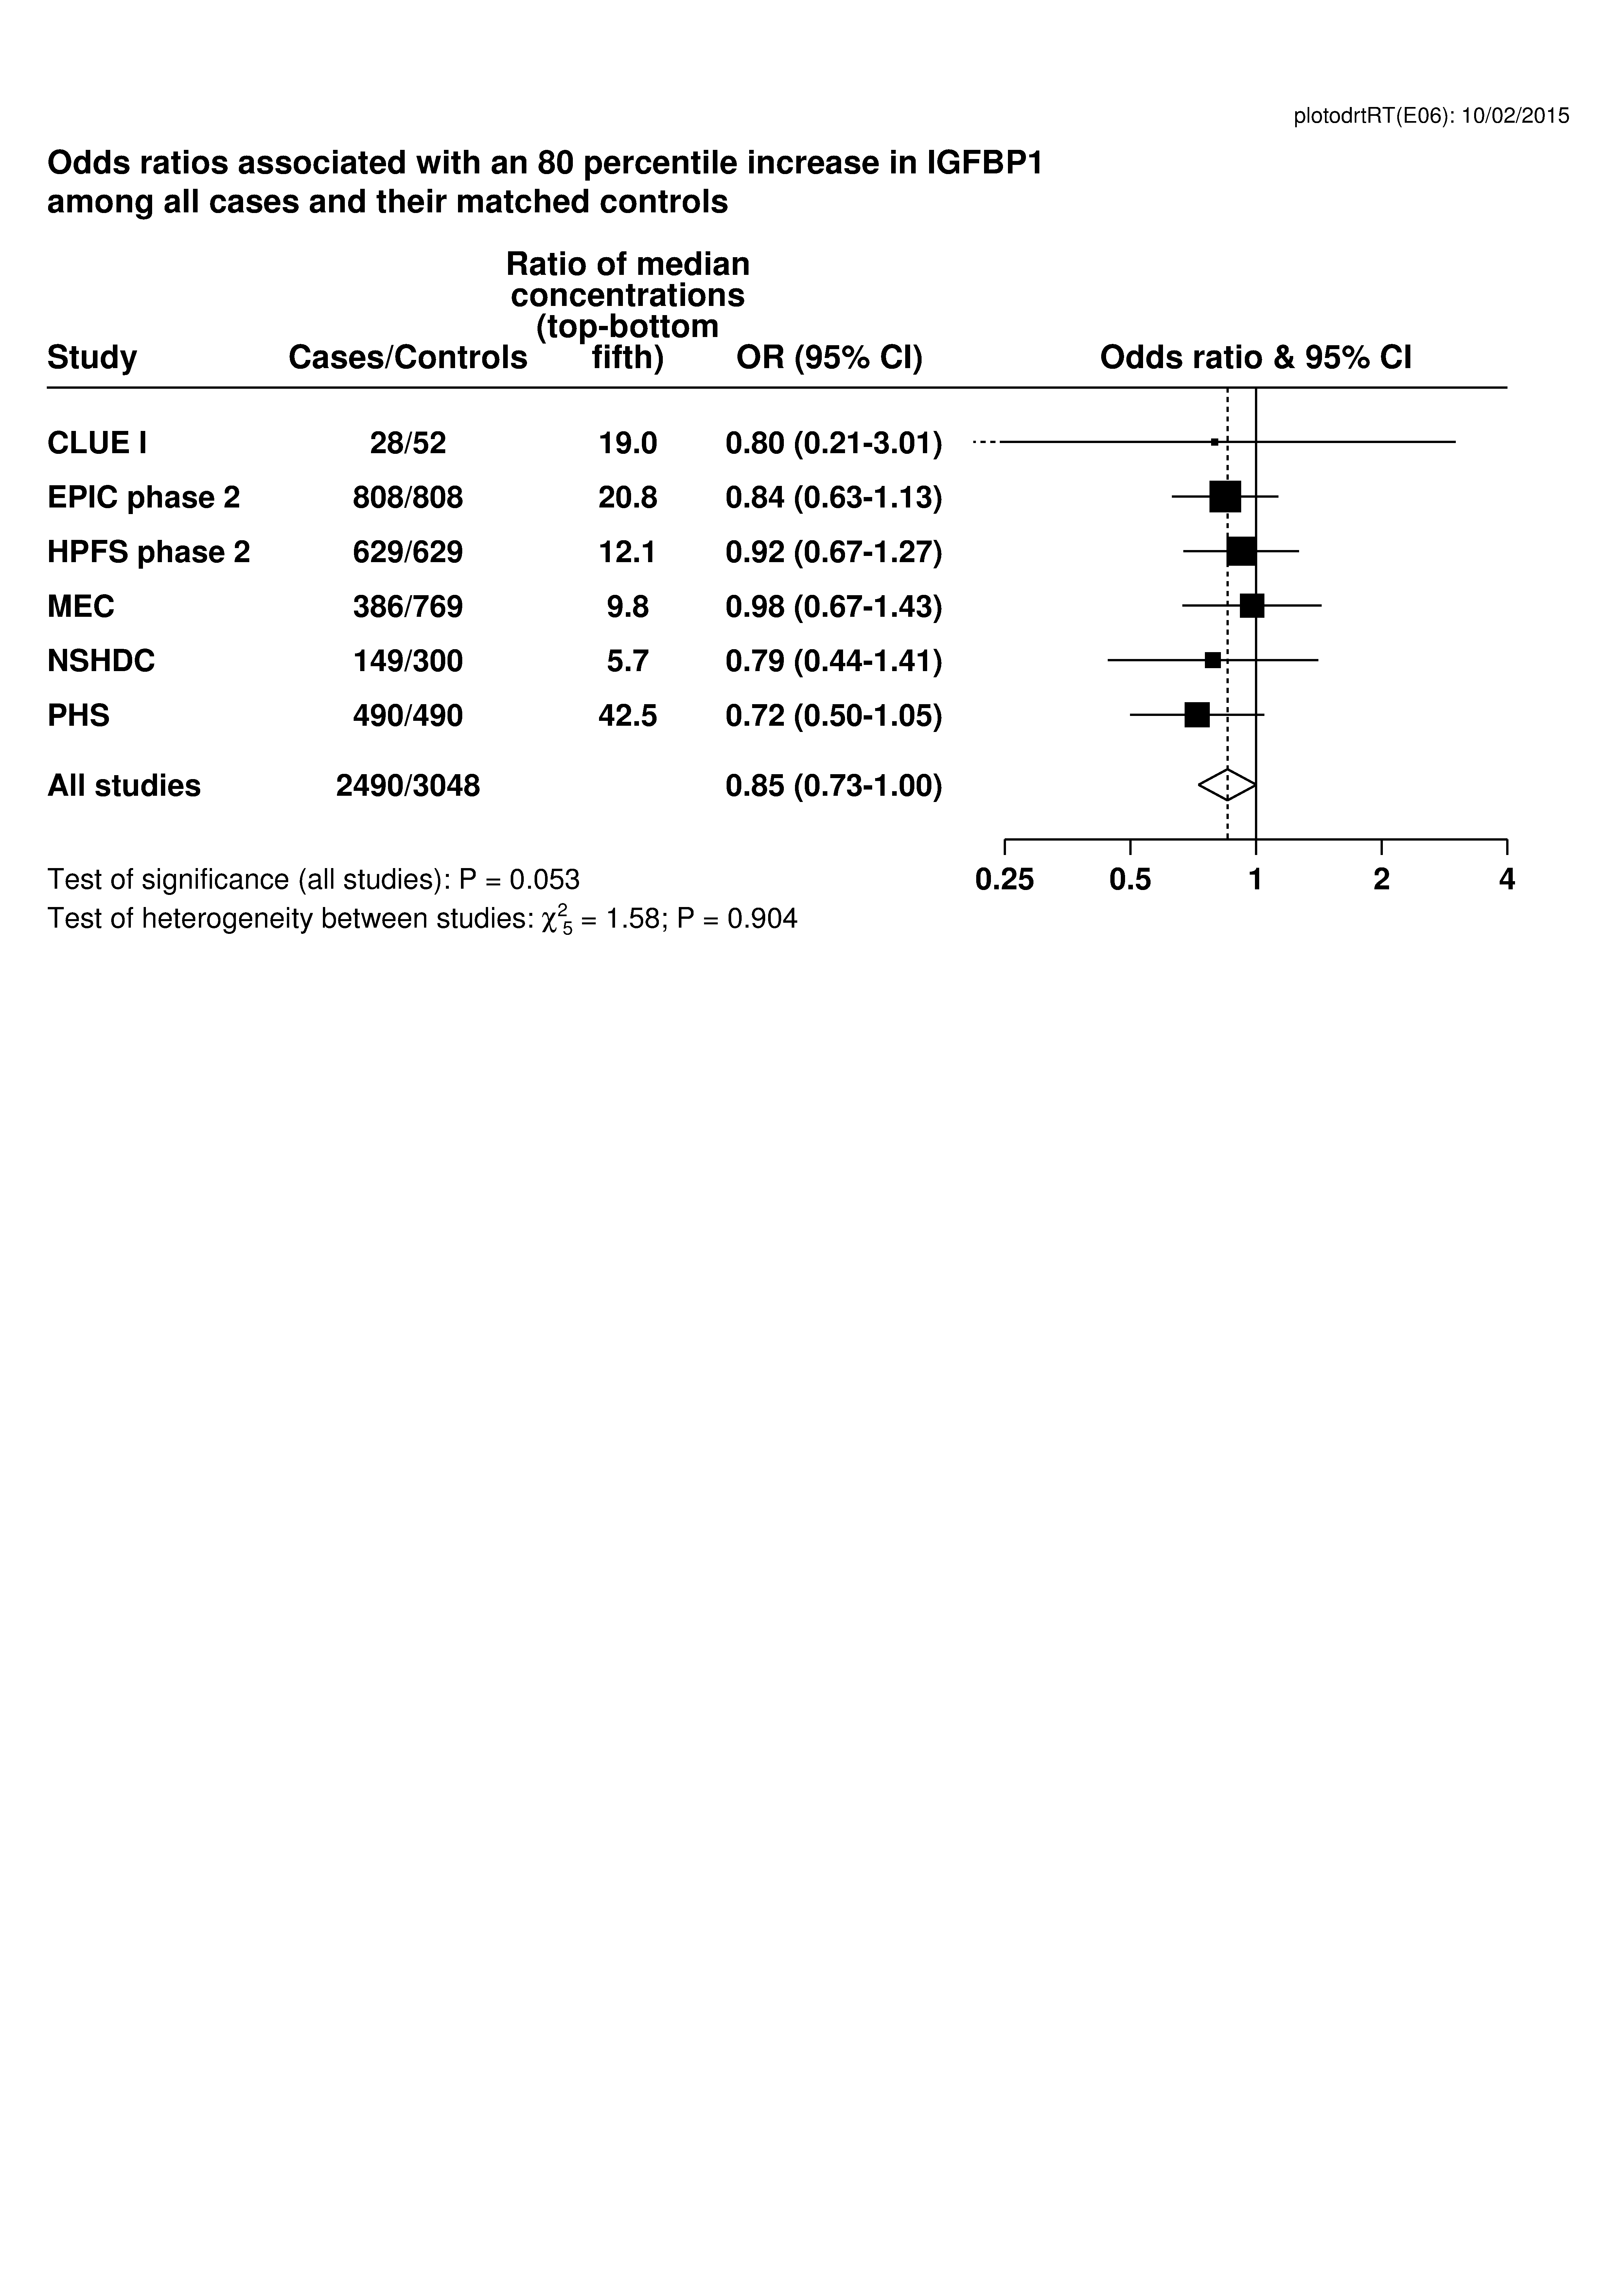


**Supplementary Figure S3. Odds ratios for prostate cancer associated with an 80 percentile increase in IGFBP-2 among all cases and their matched controls.**

**
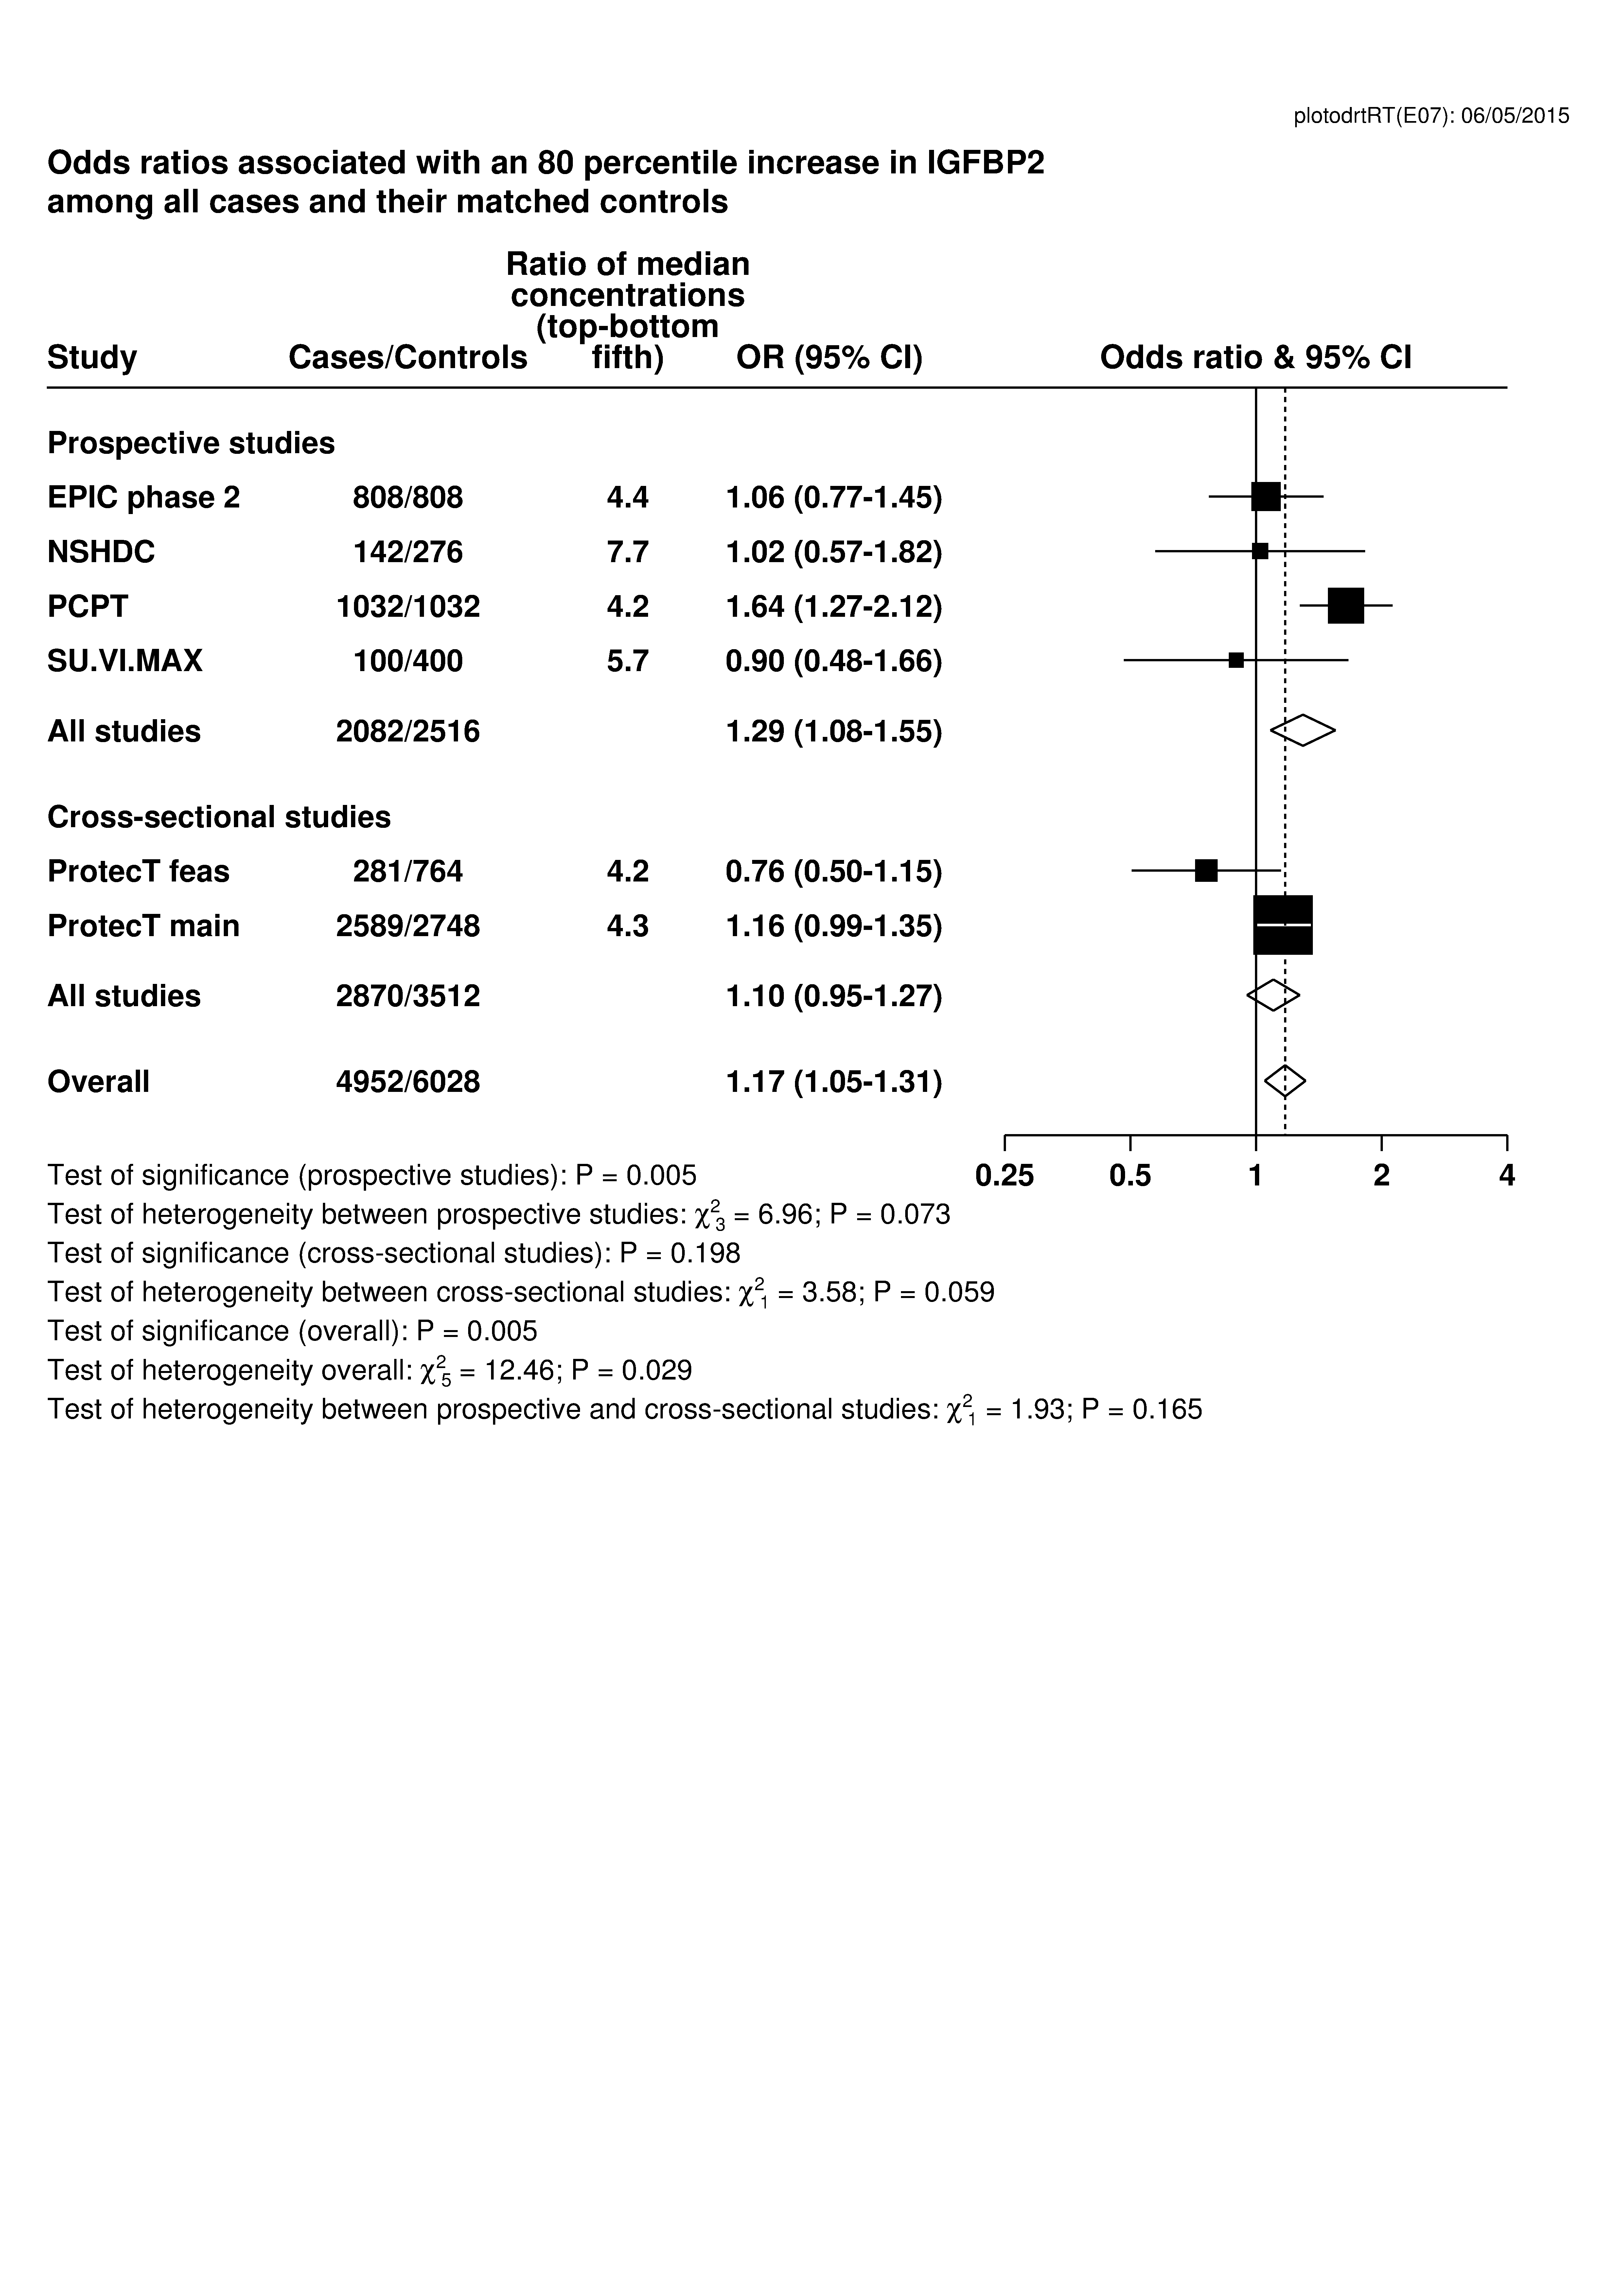
**

**Supplementary Figure S4. Odds ratios for prostate cancer associated with an 80 percentile increase in IGFBP-3 among all cases and their matched controls.**

**
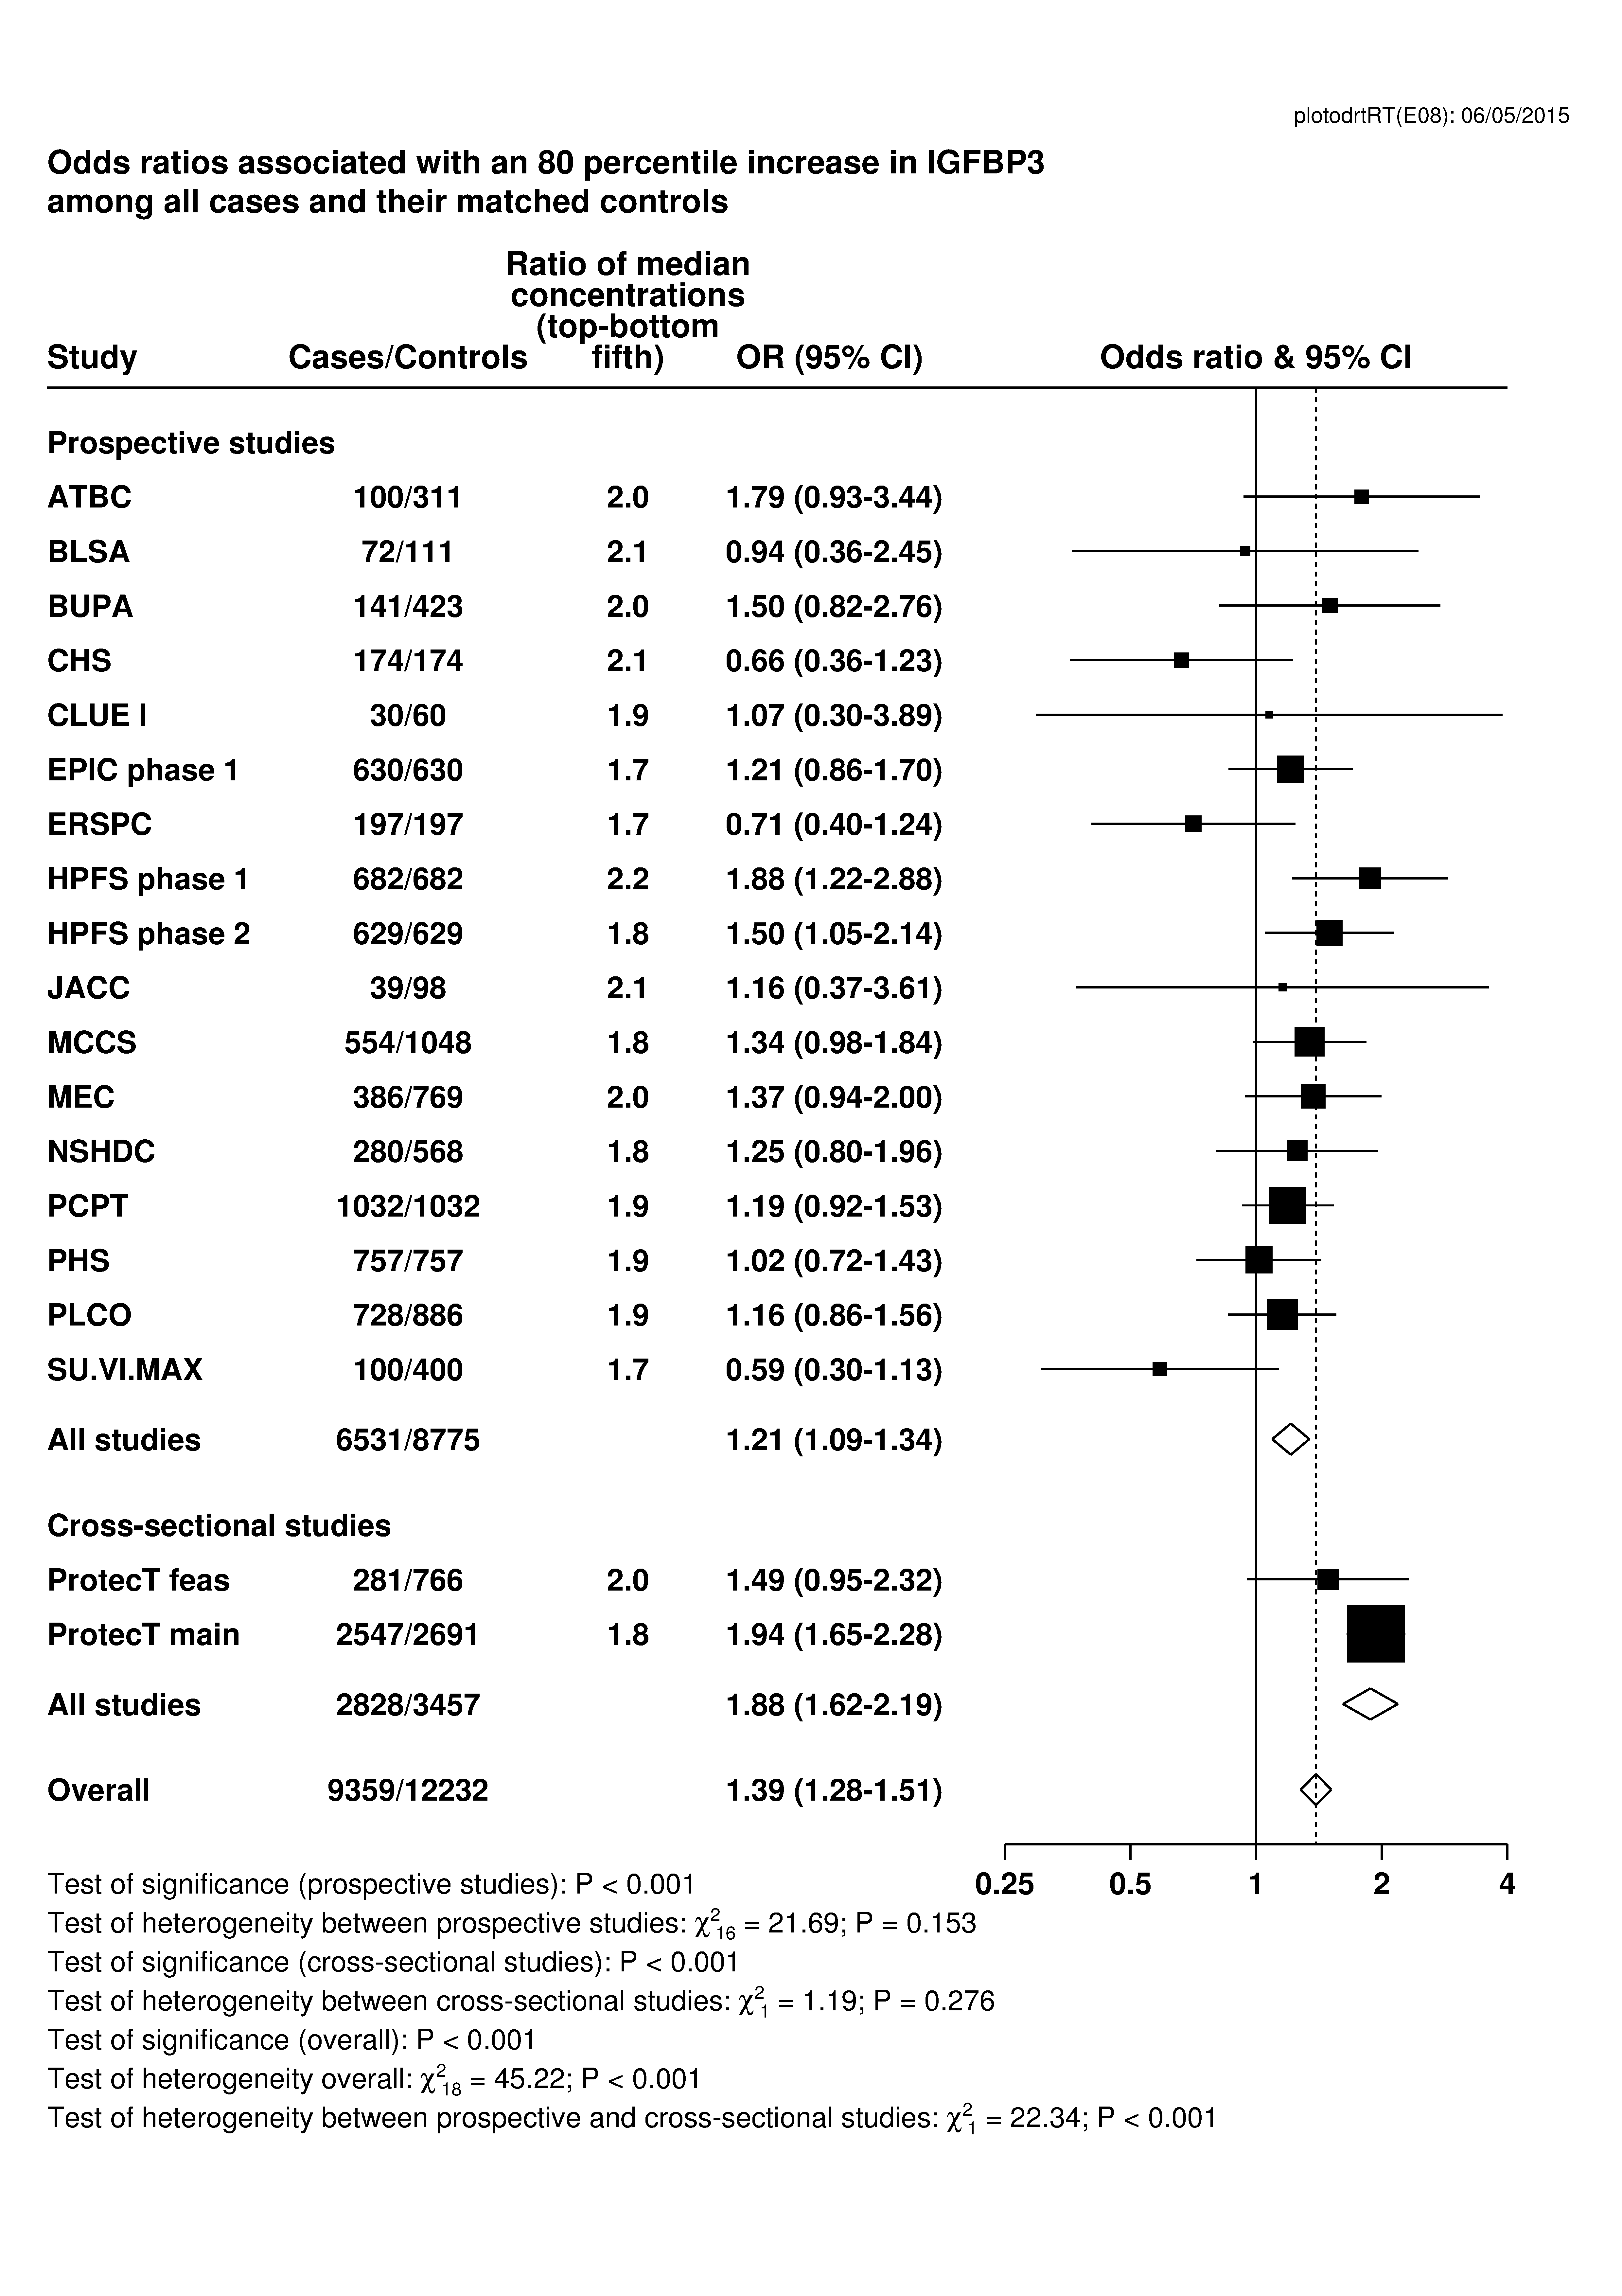
**

**Supplementary Figure S5. Odds ratios for prostate cancer associated with an 80 percentile increase in IGF-I among cases and their matched controls, subdivided by various factors.**

**
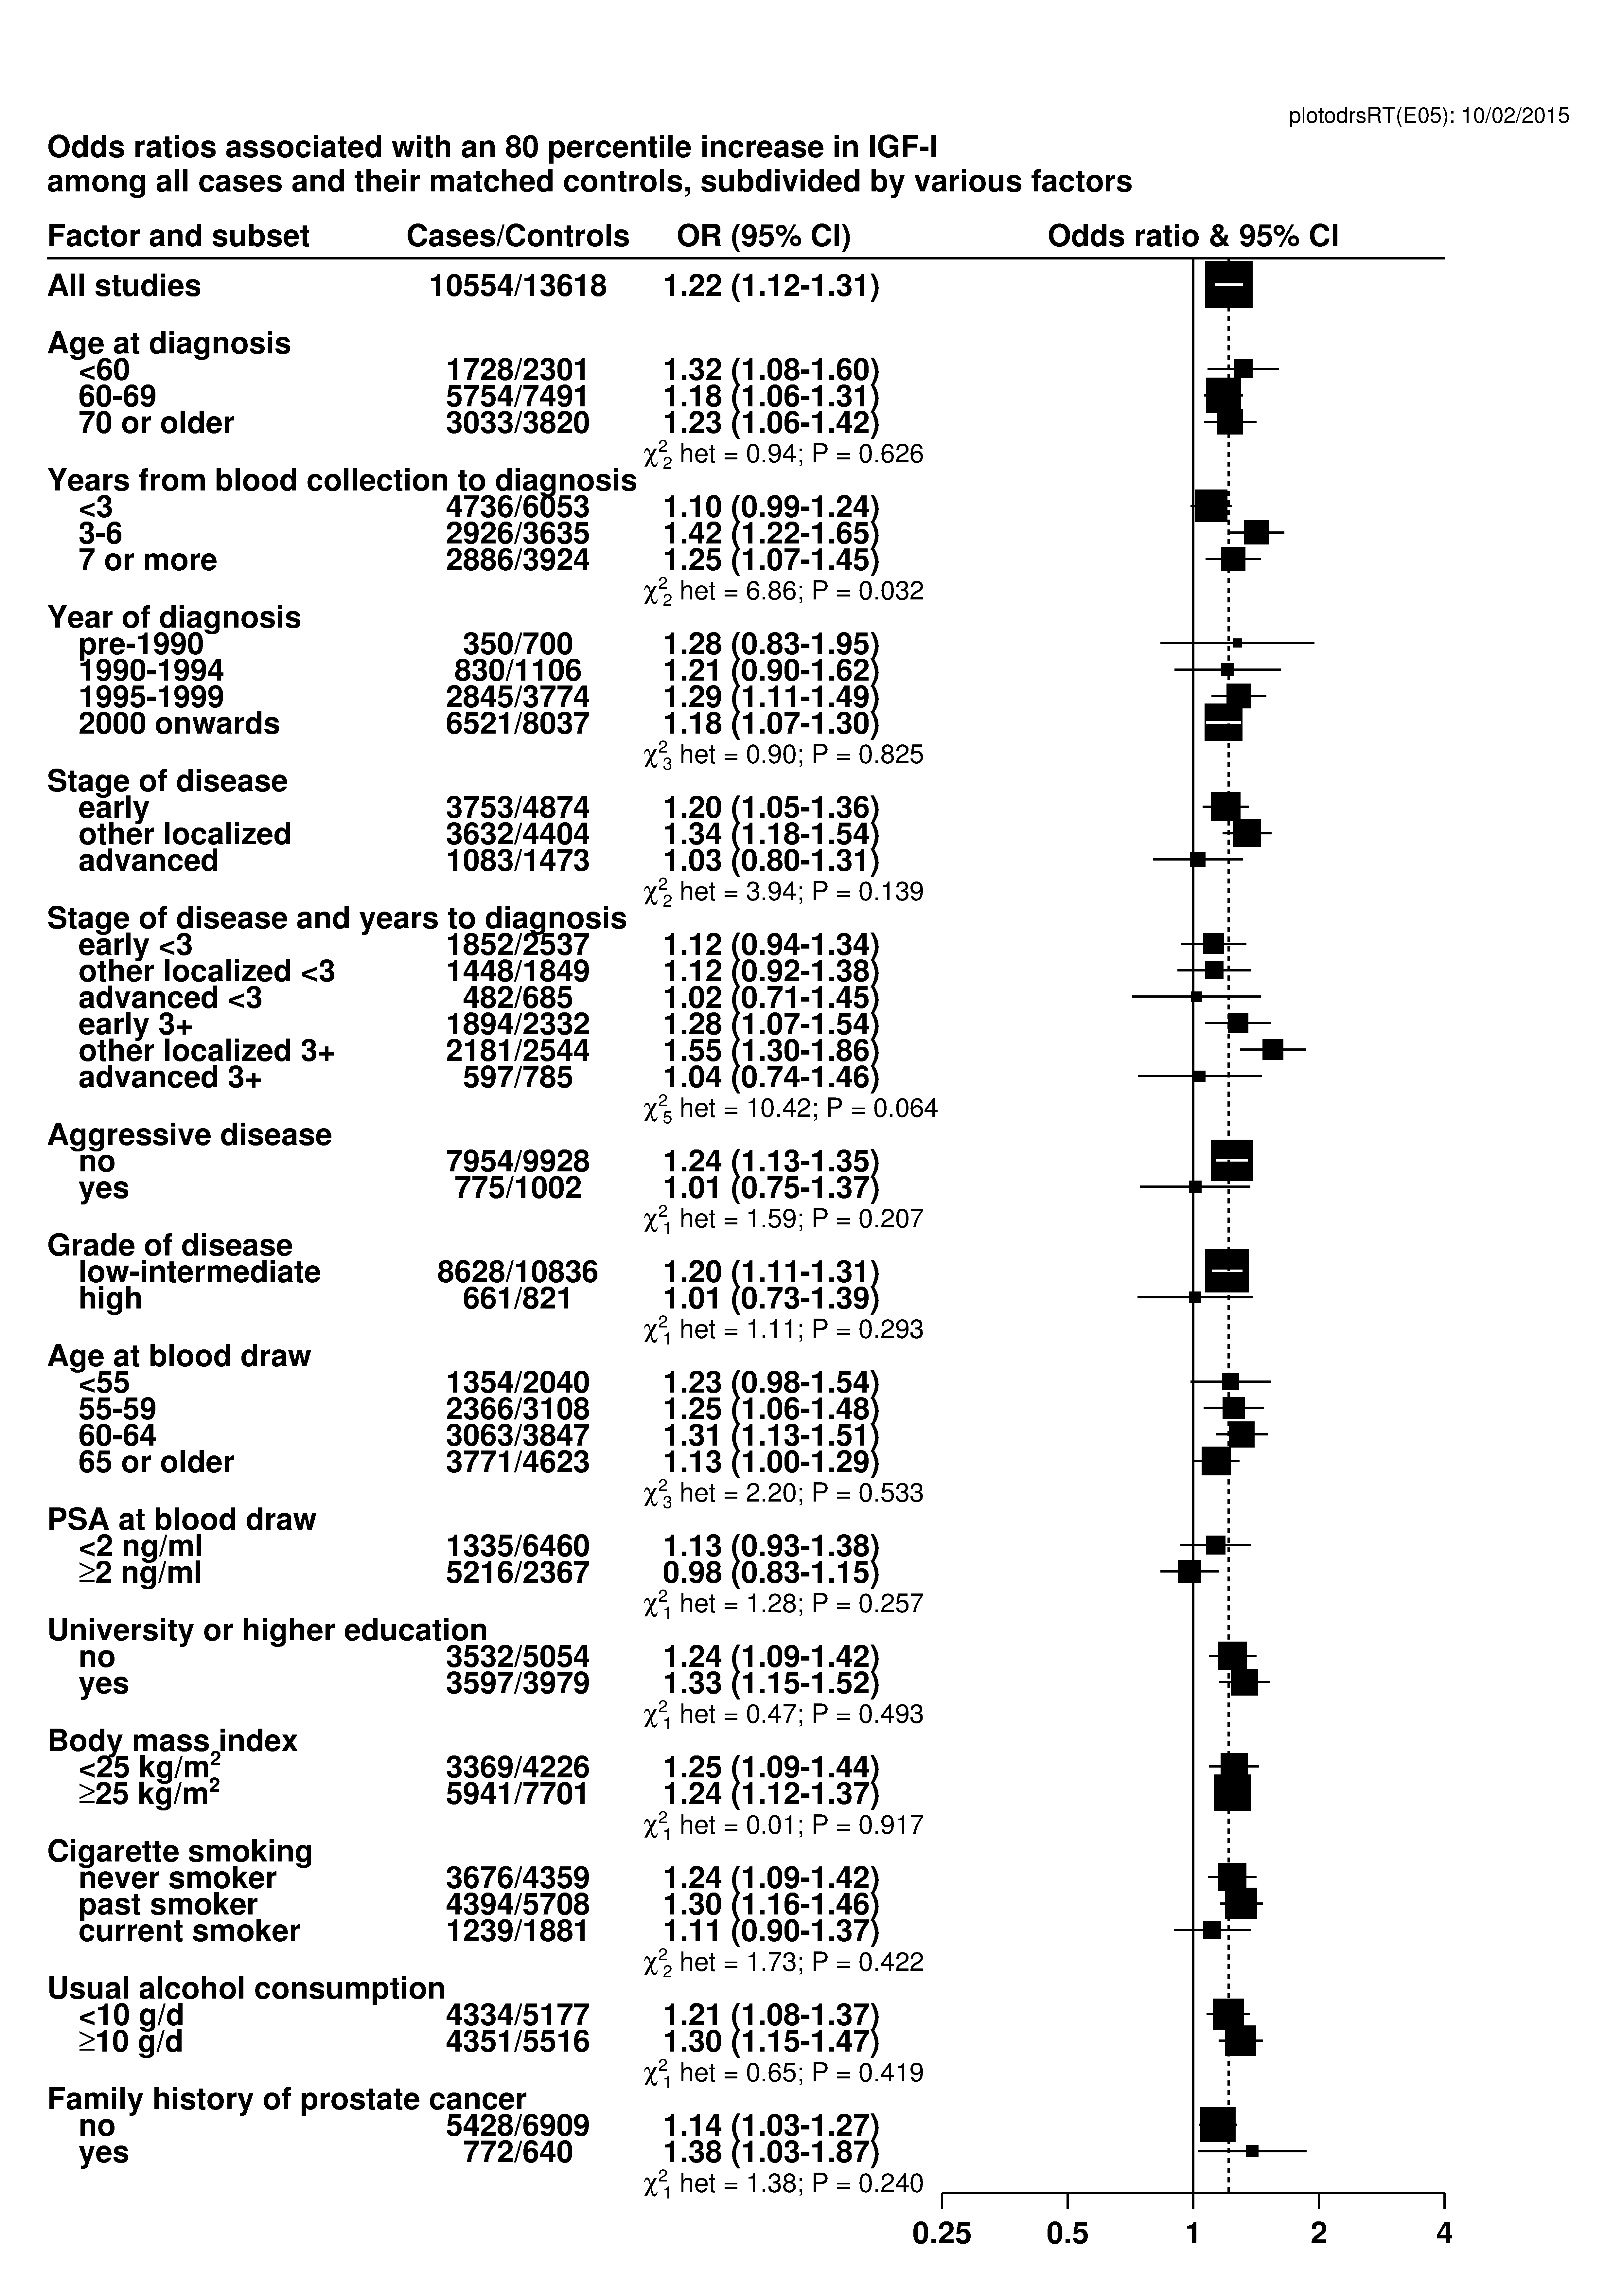
**

**Supplementary Figure S6. Odds ratios for prostate cancer associated with an 80 percentile increase in IGF-II among cases and their matched controls, subdivided by various factors.**


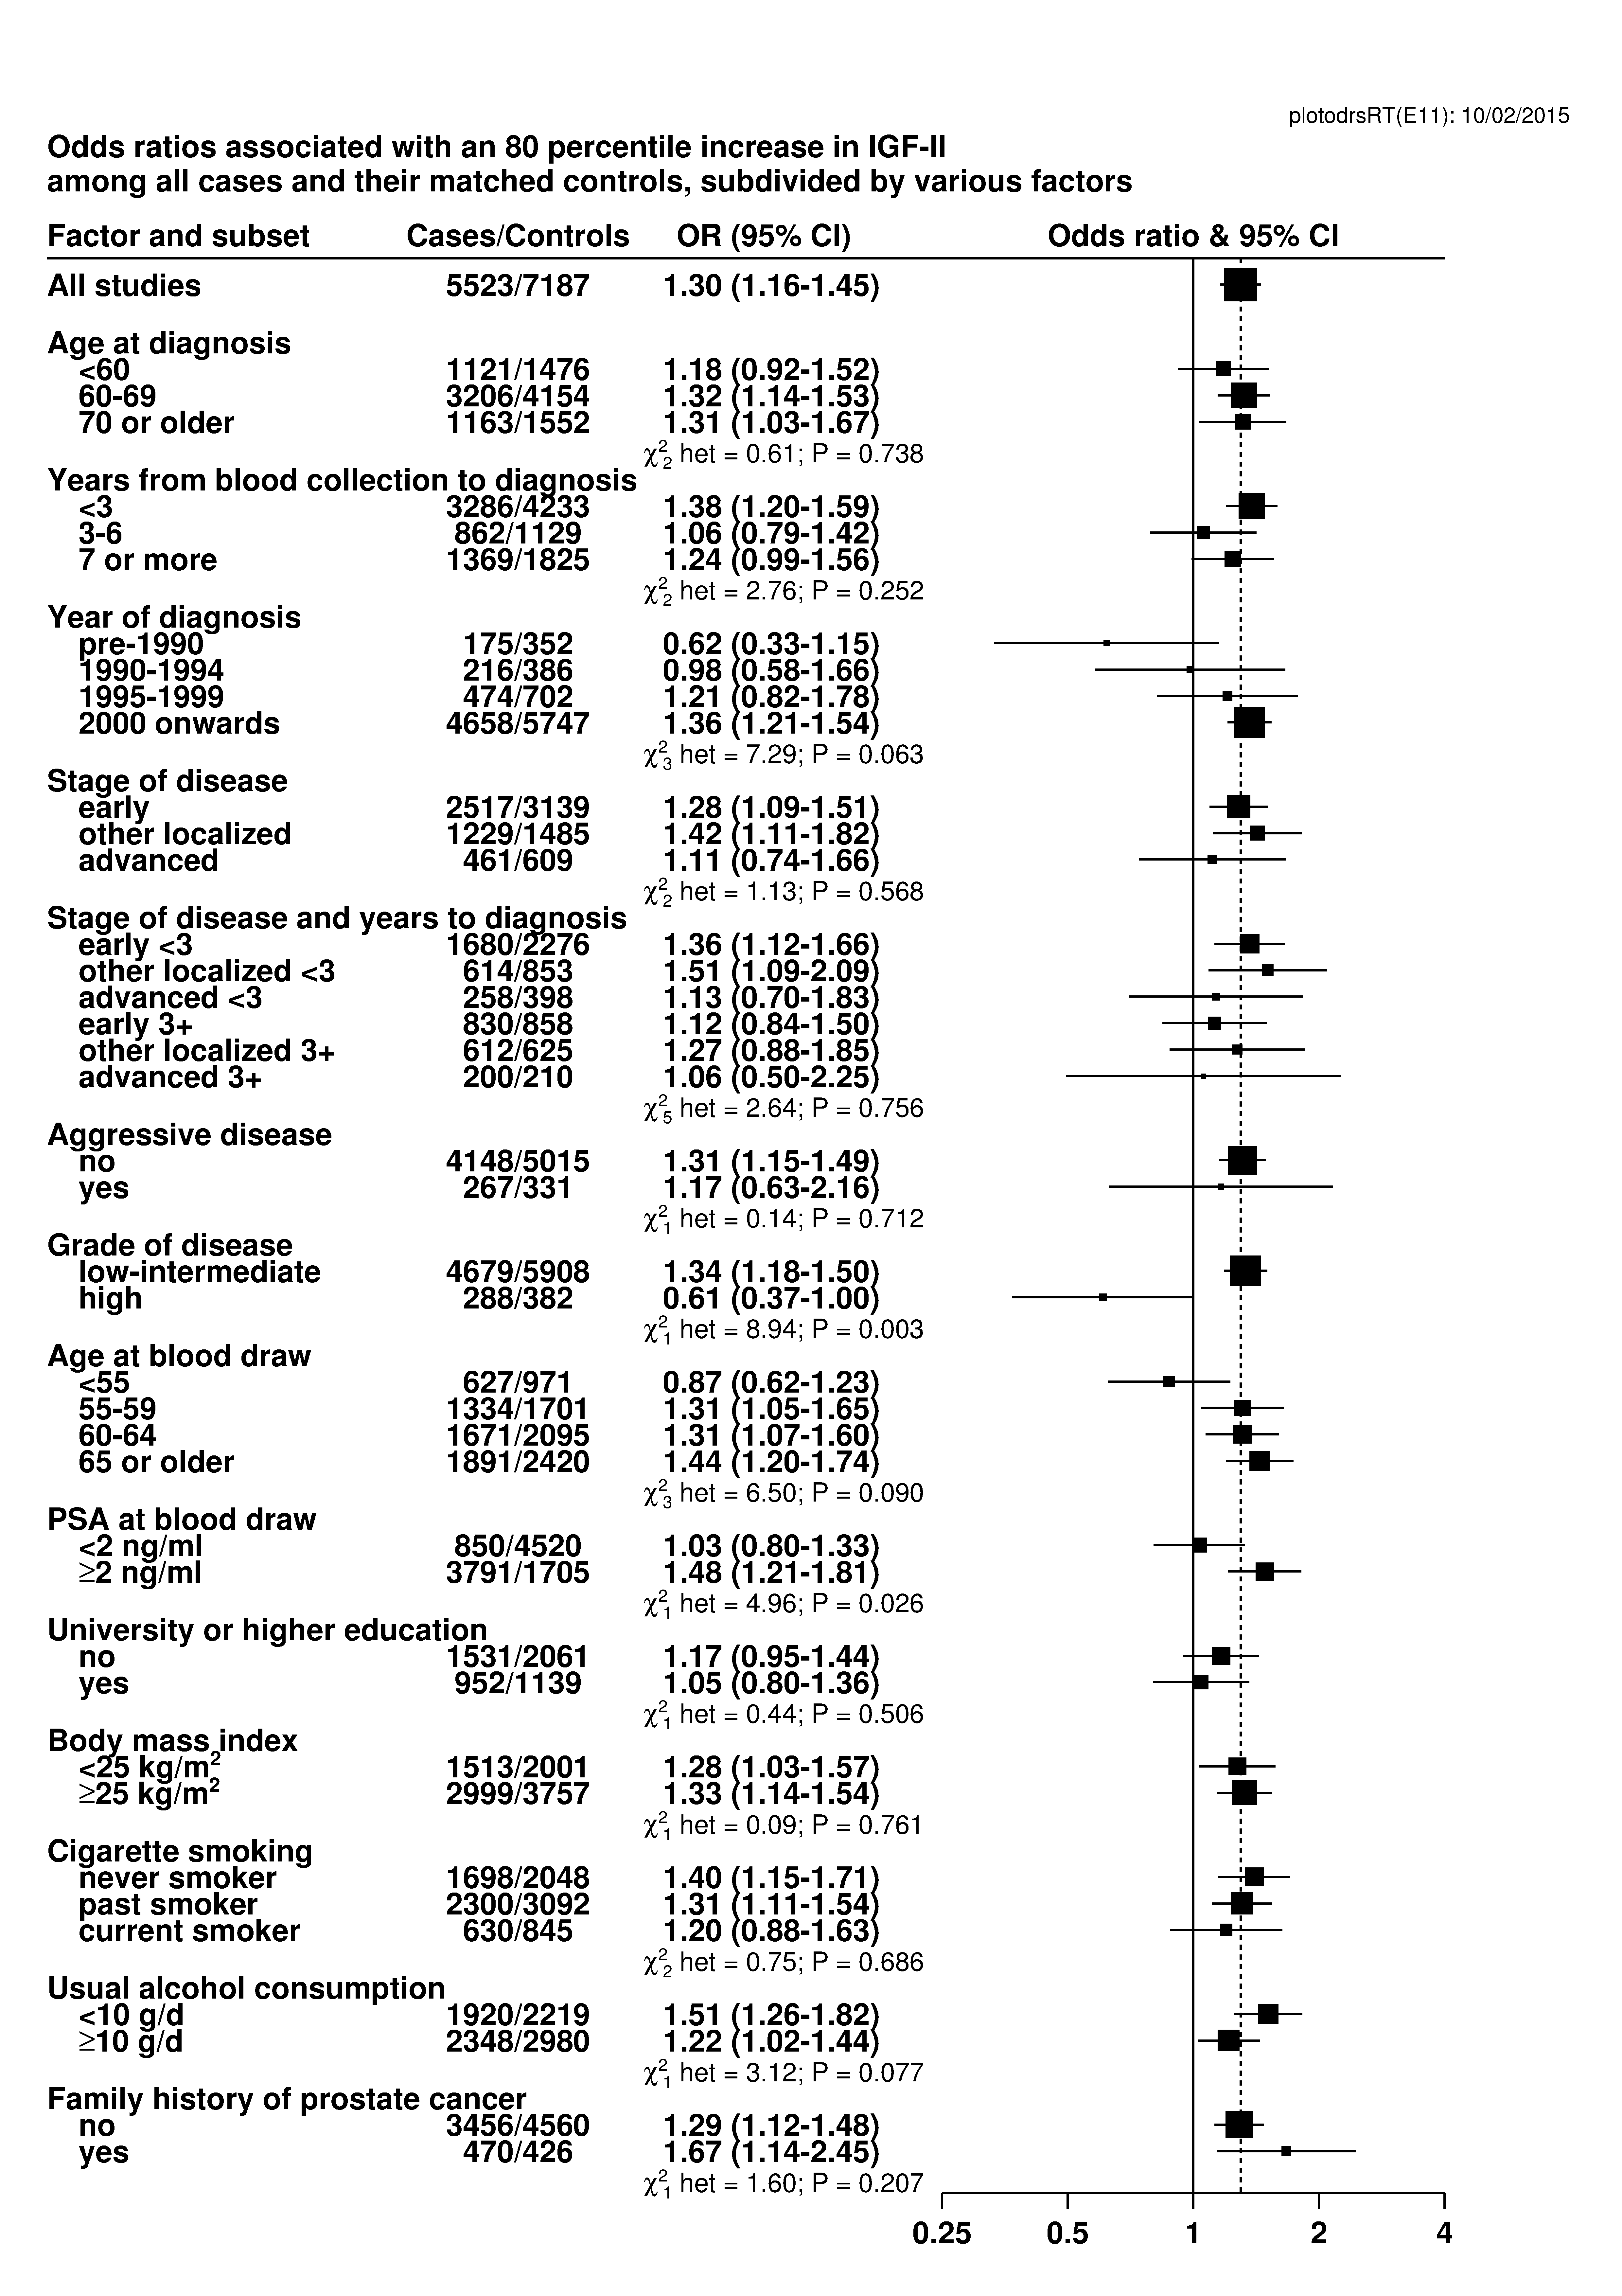


**Supplementary Figure S7. Odds ratios for prostate cancer associated with an 80 percentile increase in IGF-II among all cases and their matched controls in prospectives studies, subdivided by various factors.**

**
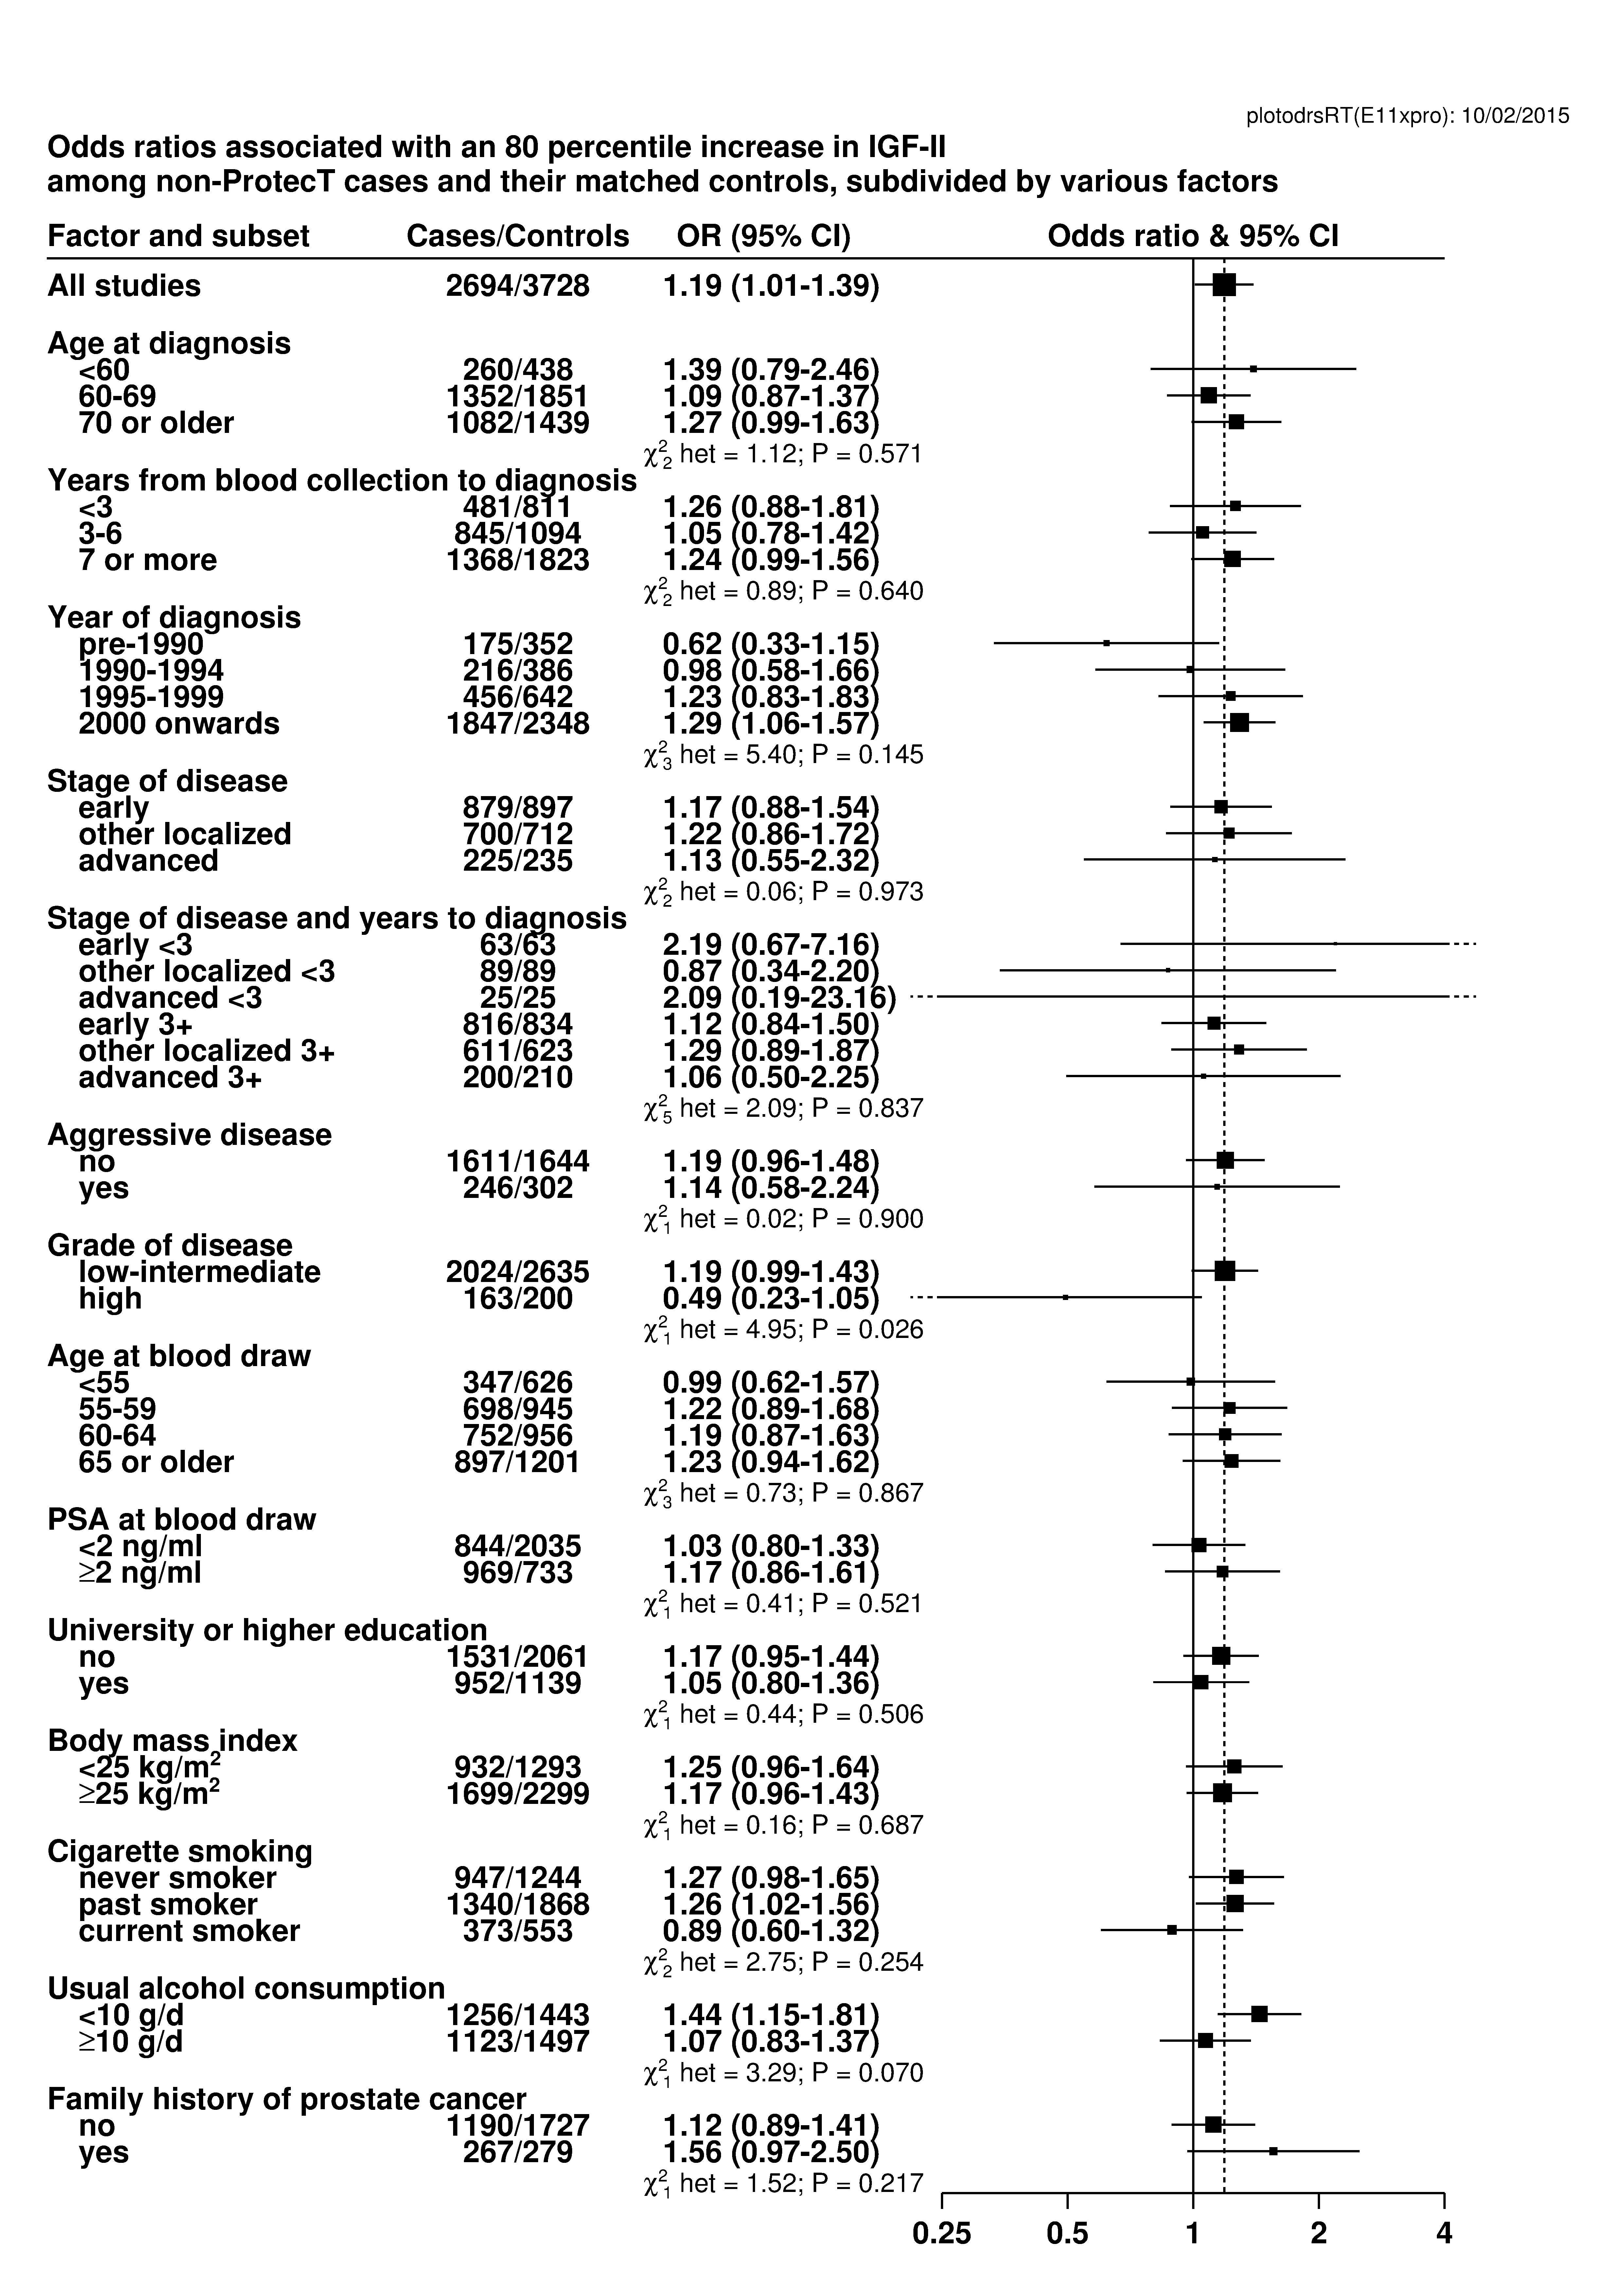
**

**Supplementary Figure S8. Odds ratios for prostate cancer associated with an 80 percentile increase in IGFBP-1 among all cases and their matched controls in prospective studies, subdivided by various factors (data are only available for IGFBP-1 from prospective studies and not cross-sectional studies).**


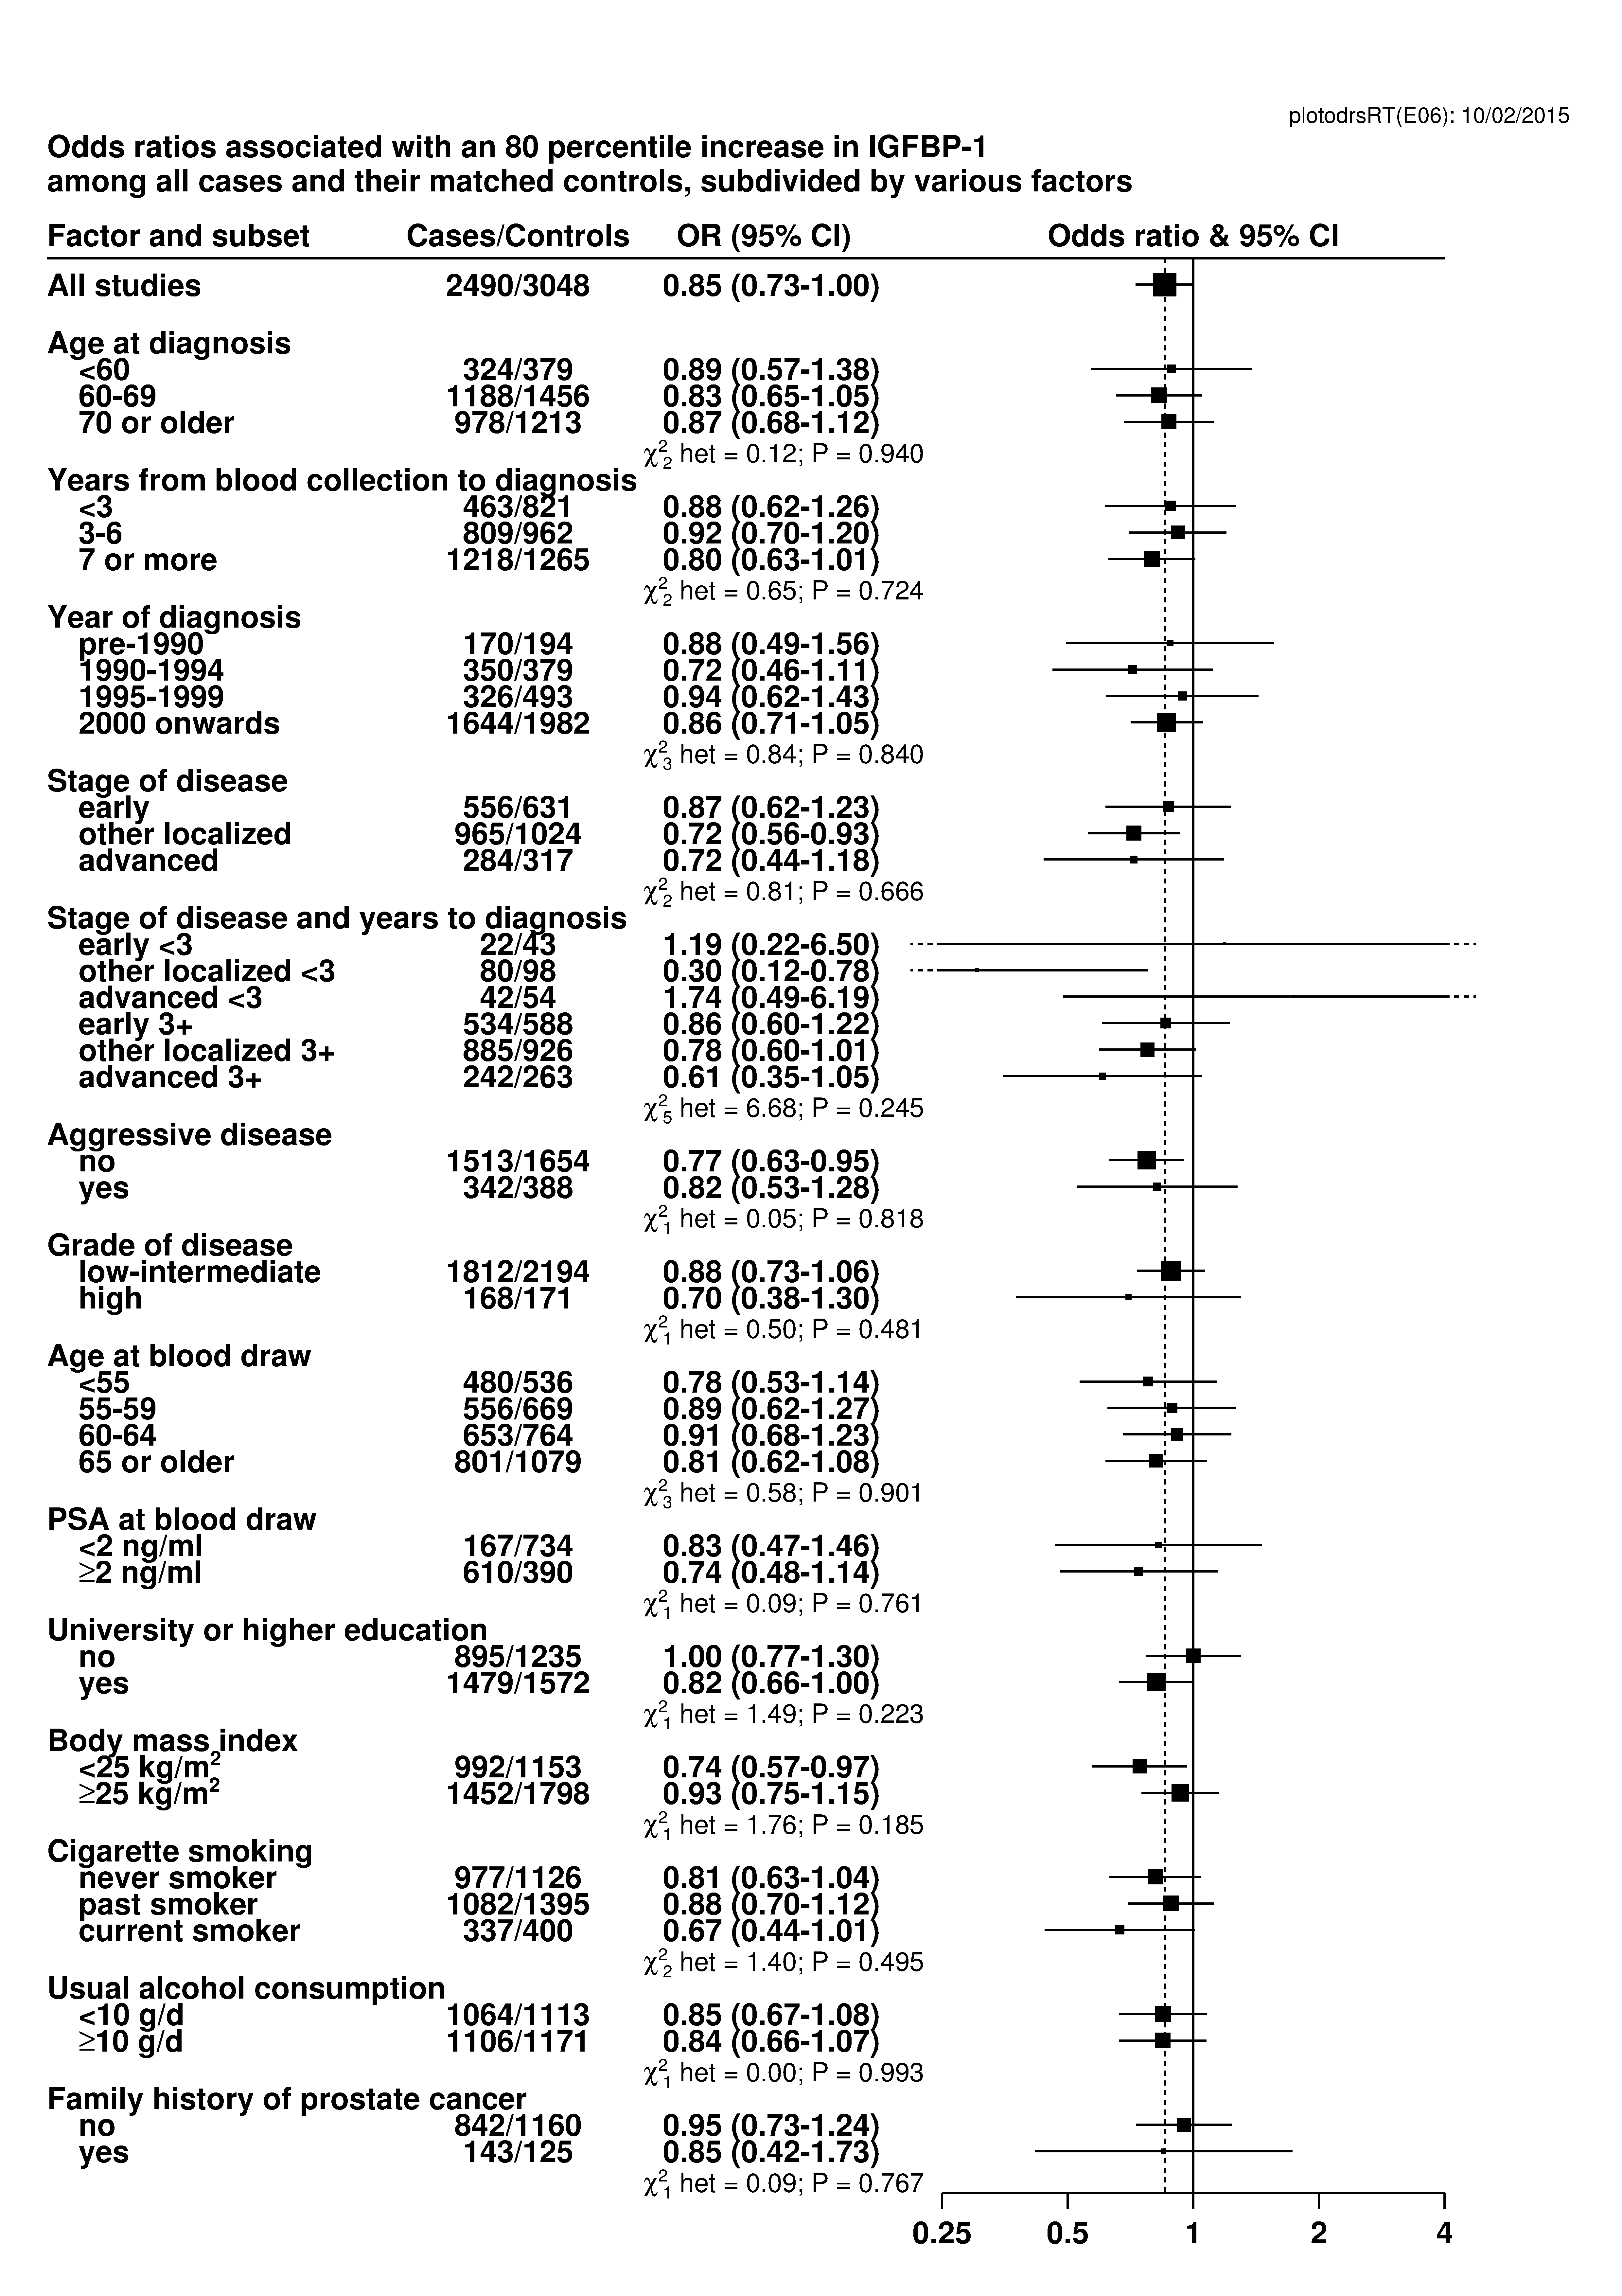


**Supplementary Figure S9. Odds ratios for prostate cancer associated with an 80 percentile increase in IGFBP-2 among cases and their matched controls, subdivided by various factors.**

**
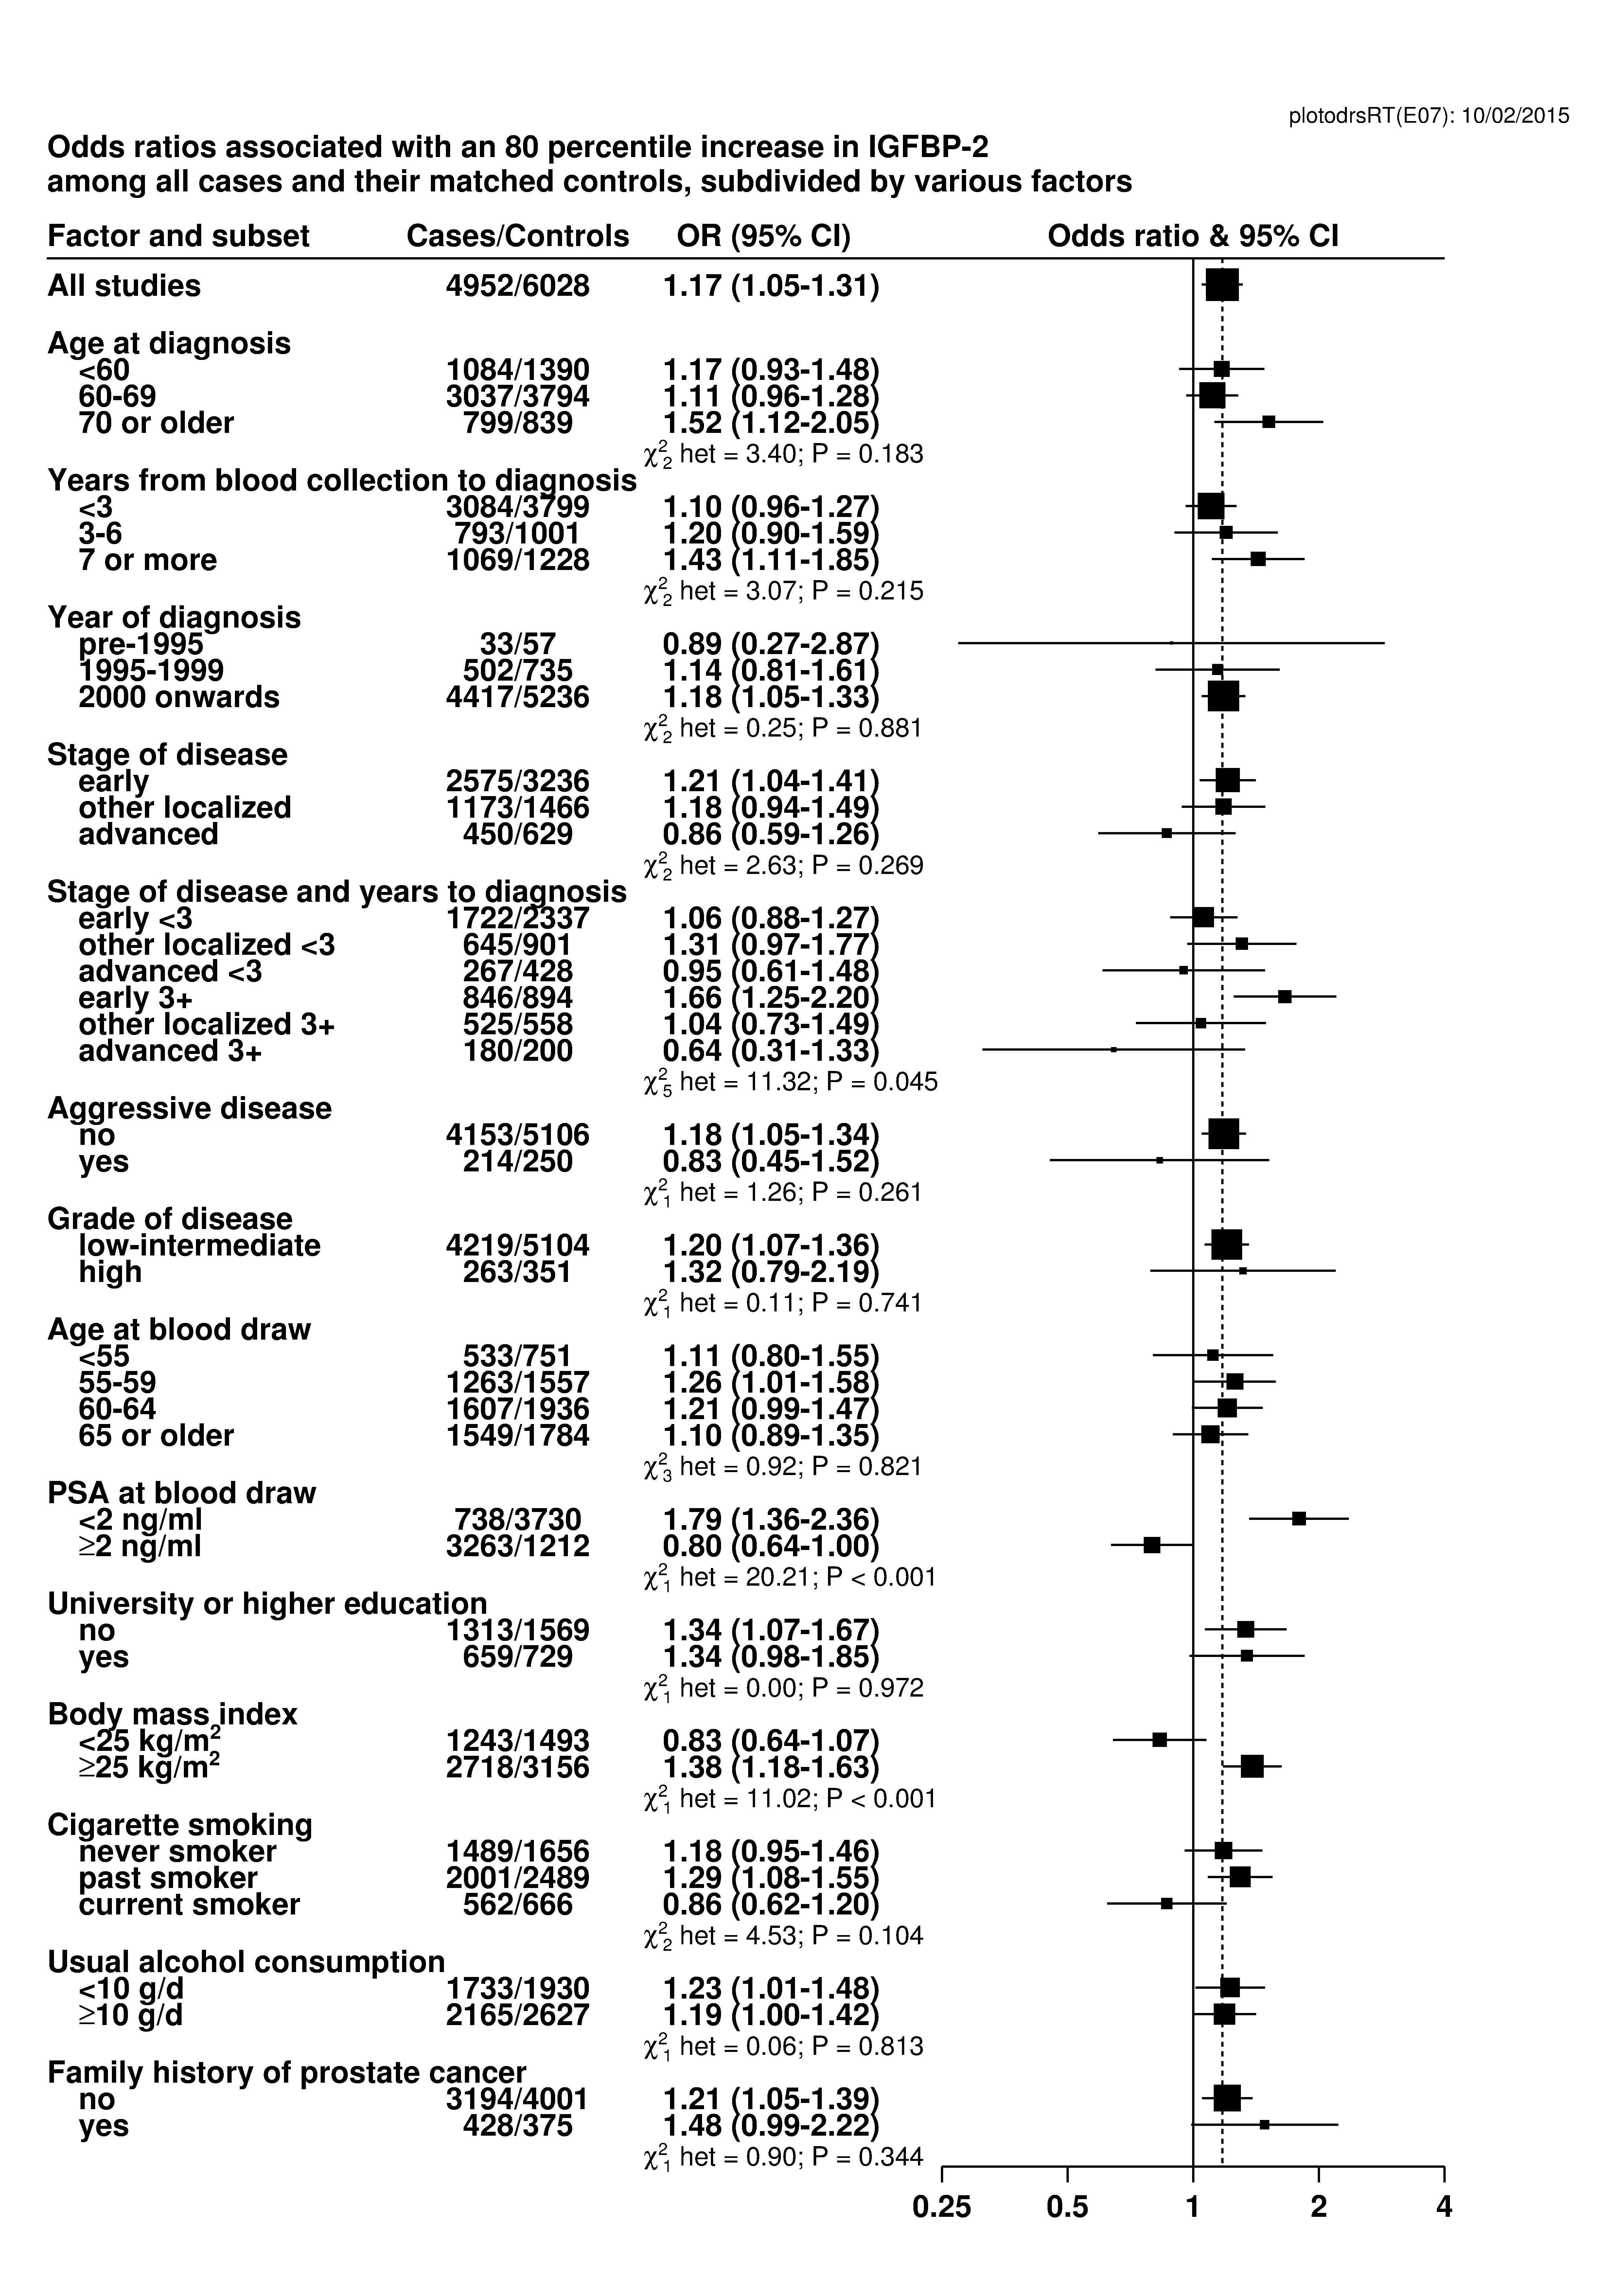
**

**Supplementary Figure S10. Odds ratios for prostate cancer associated with an 80 percentile increase in IGFBP-2 among all cases and their matched controls in prospective studies, subdivided by various factors.**

**
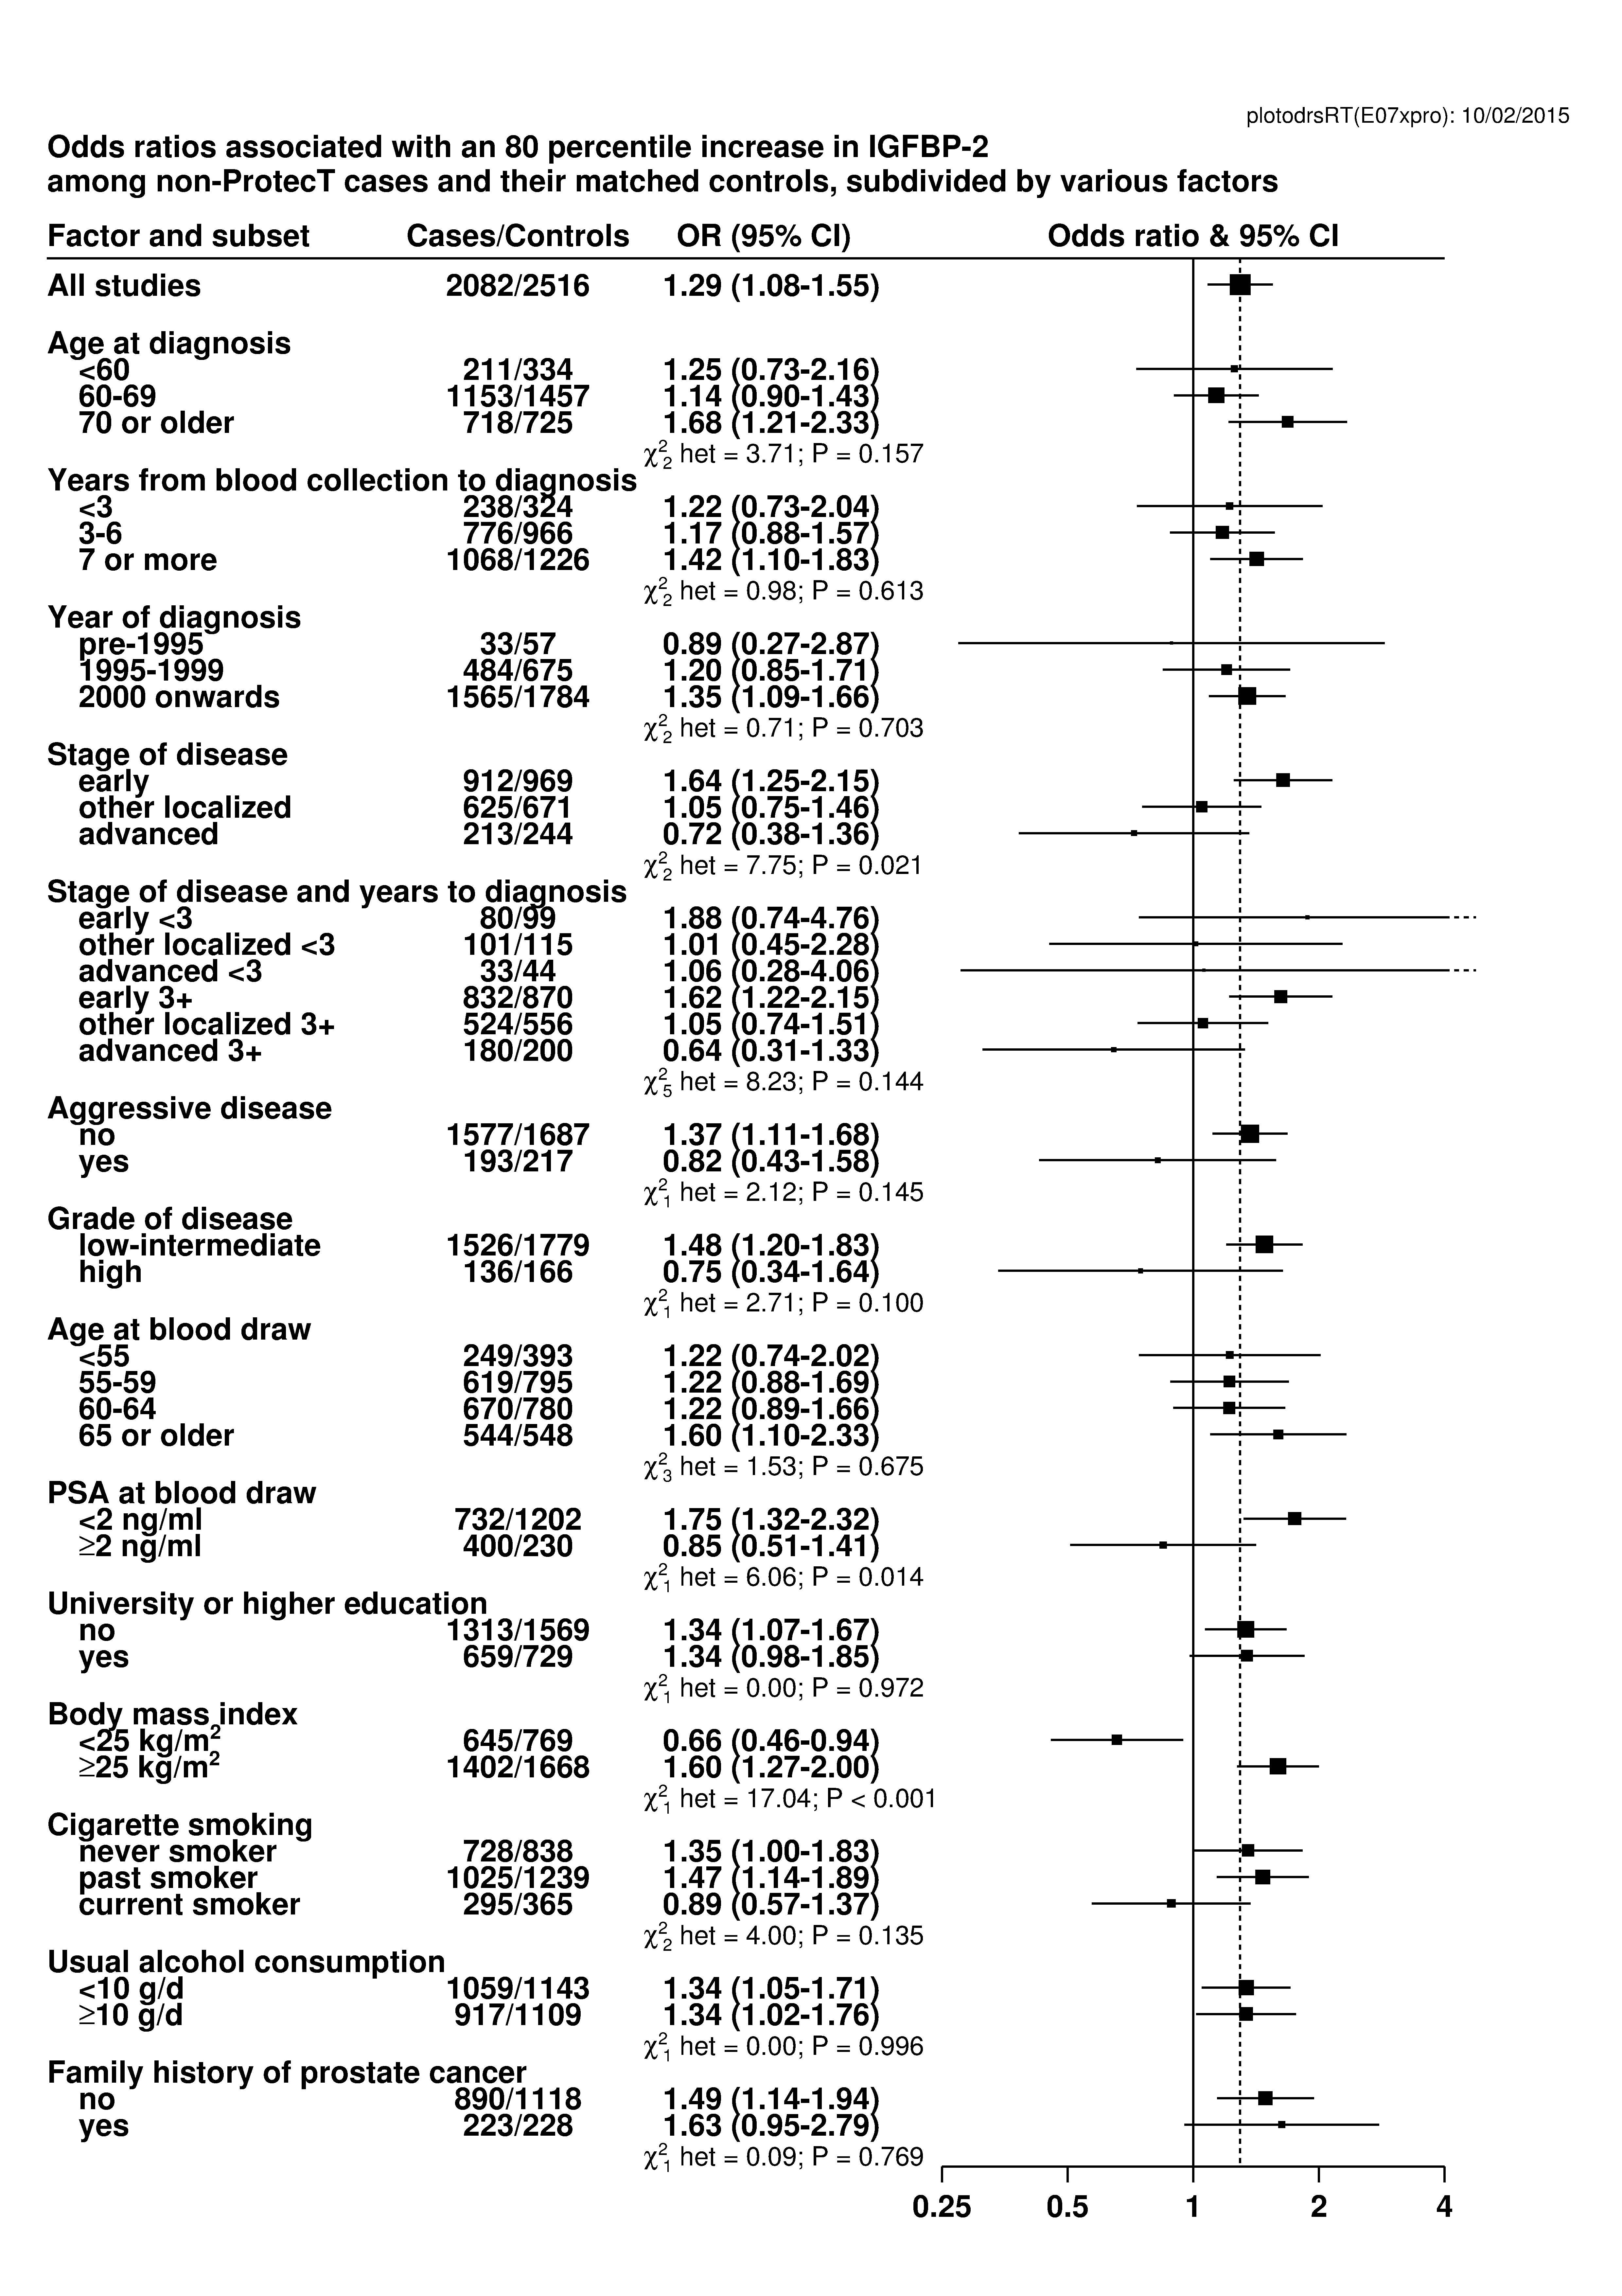
**

**Supplementary Figure S11. Odds ratios for prostate cancer associated with an 80 percentile increase in IGFBP-3 among cases and their matched controls, subdivided by various factors.**

**
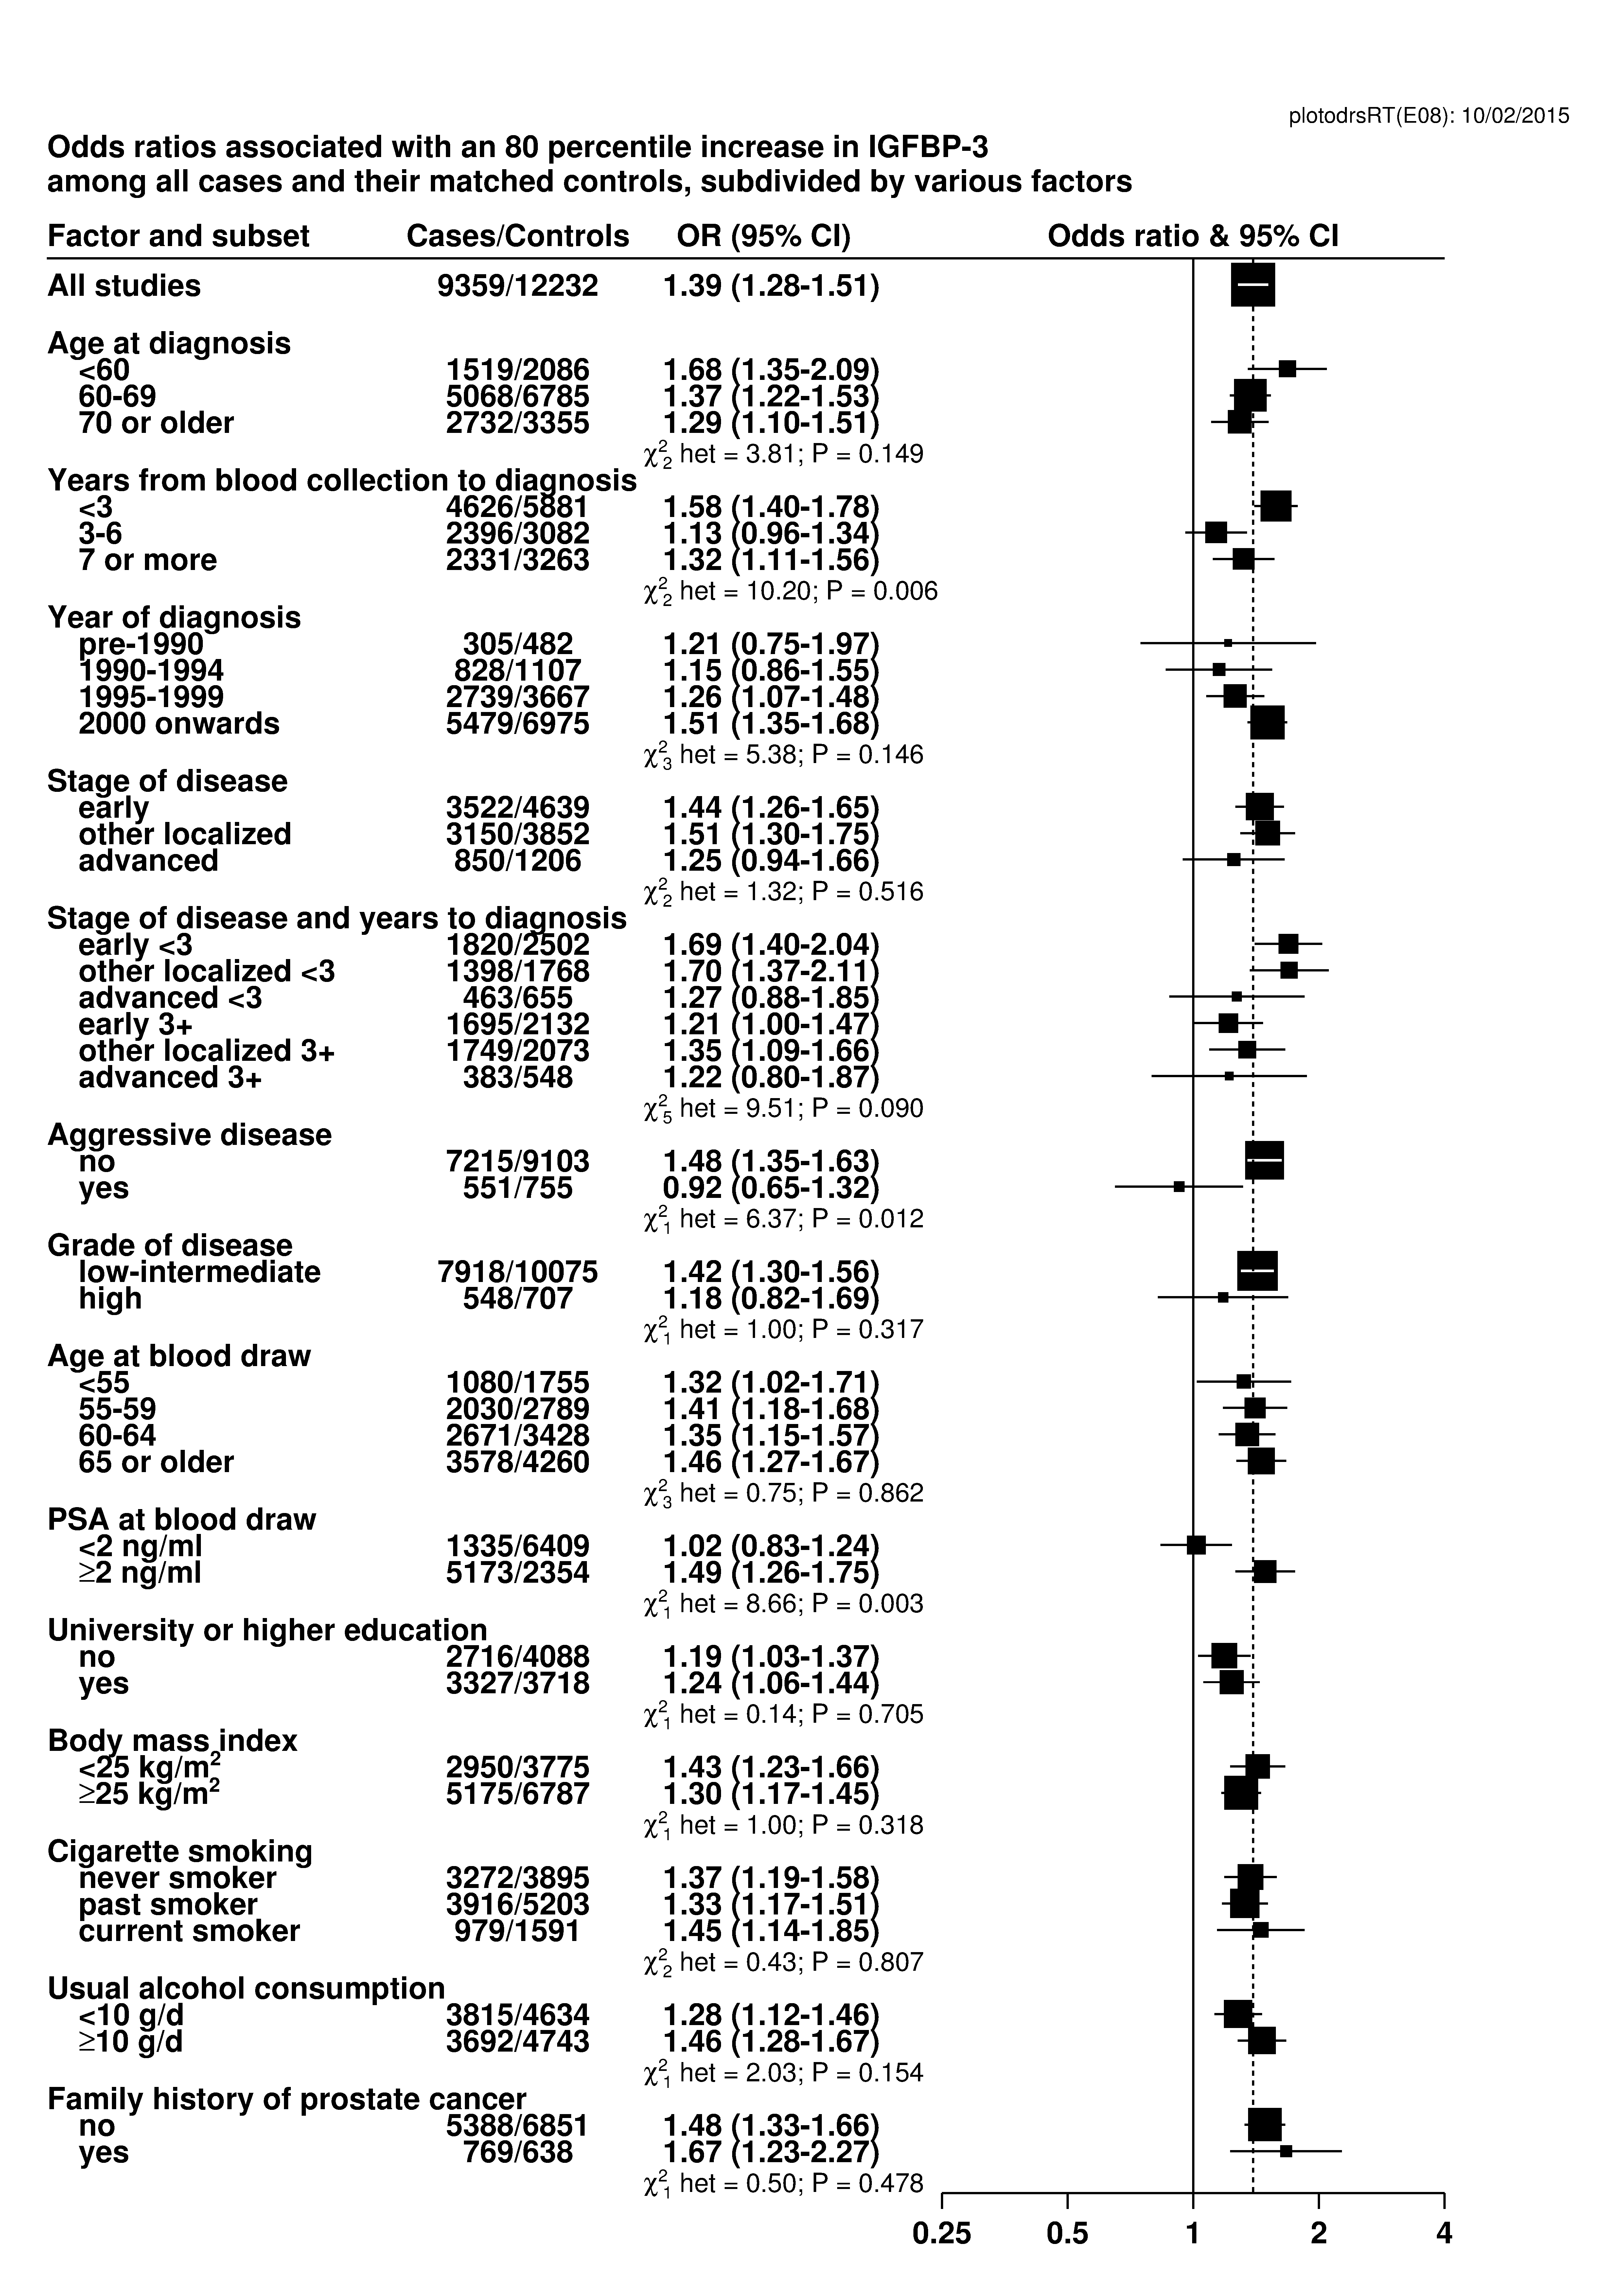
**

**Supplementary Figure S12. Odds ratios for prostate cancer associated with an 80 percentile increase in IGFBP-3 among cases and their matched controls in prospective studies, subdivided by various factors.**

**
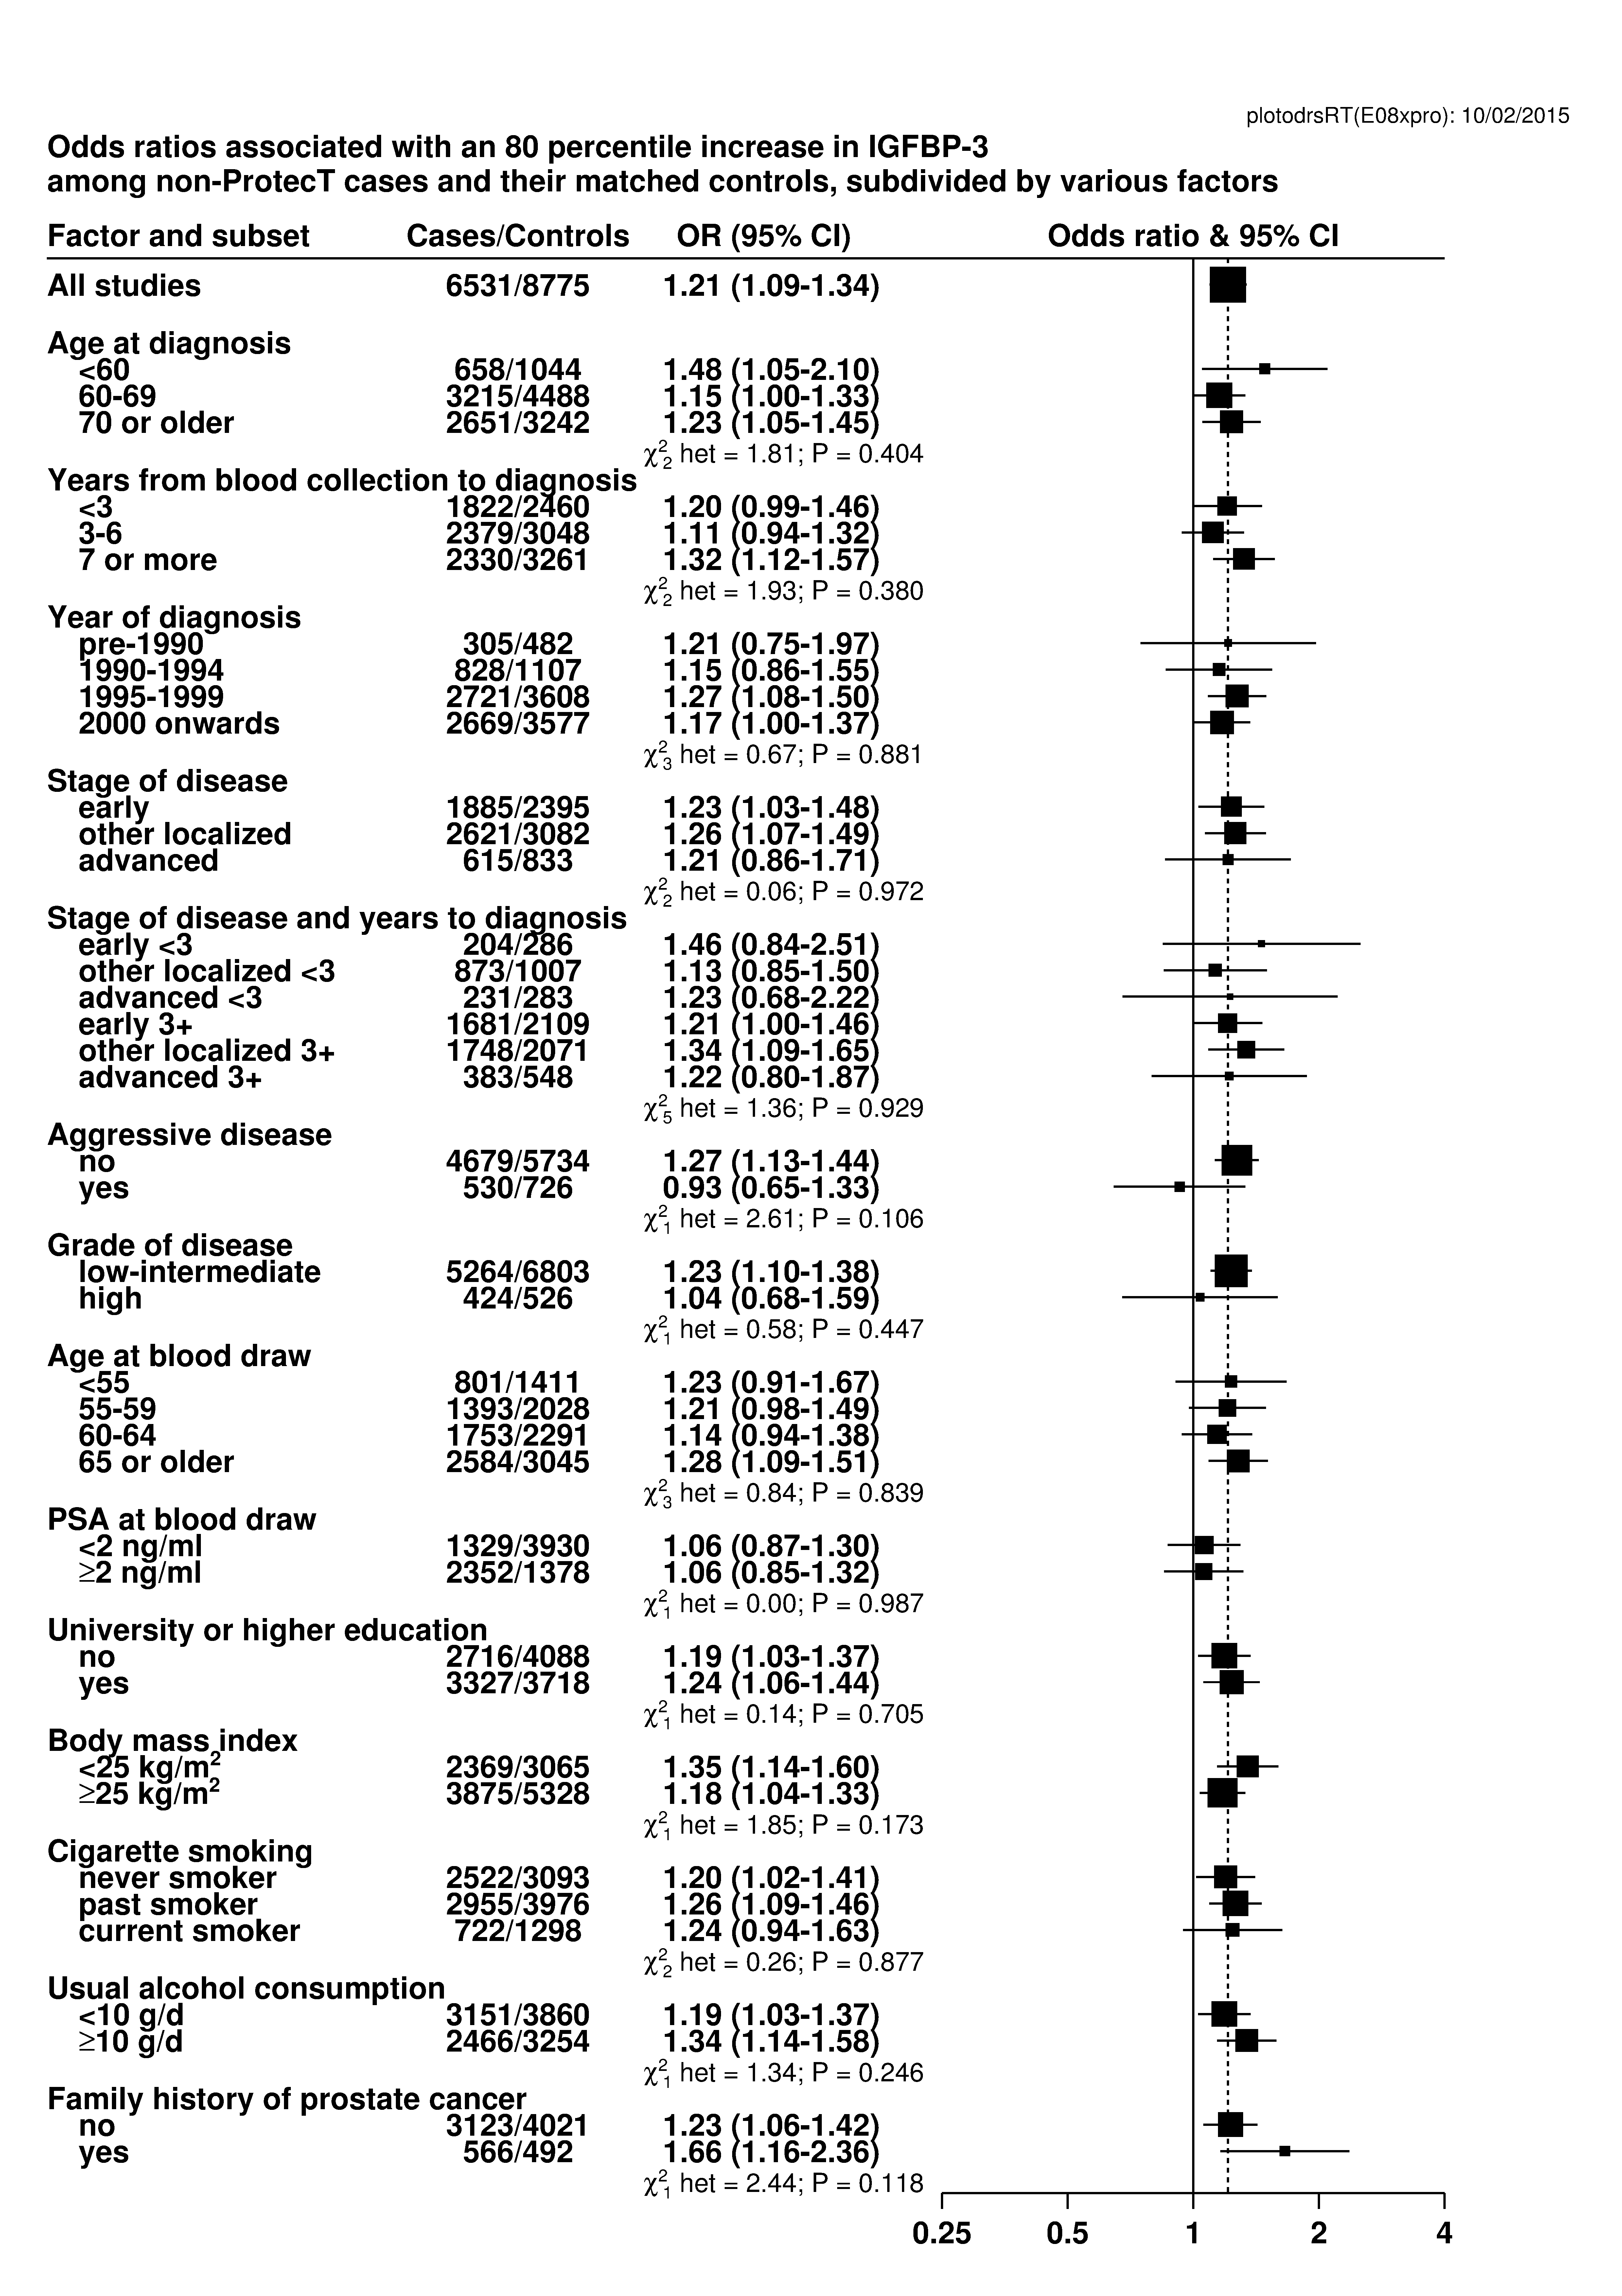
**

**Supplementary Figure S13. Odds ratios for aggressive prostate cancer by study-specific fifths of concentrations of selected insulin-like growth factors and their binding proteins among cases and their matched controls in prospective studies.**

**
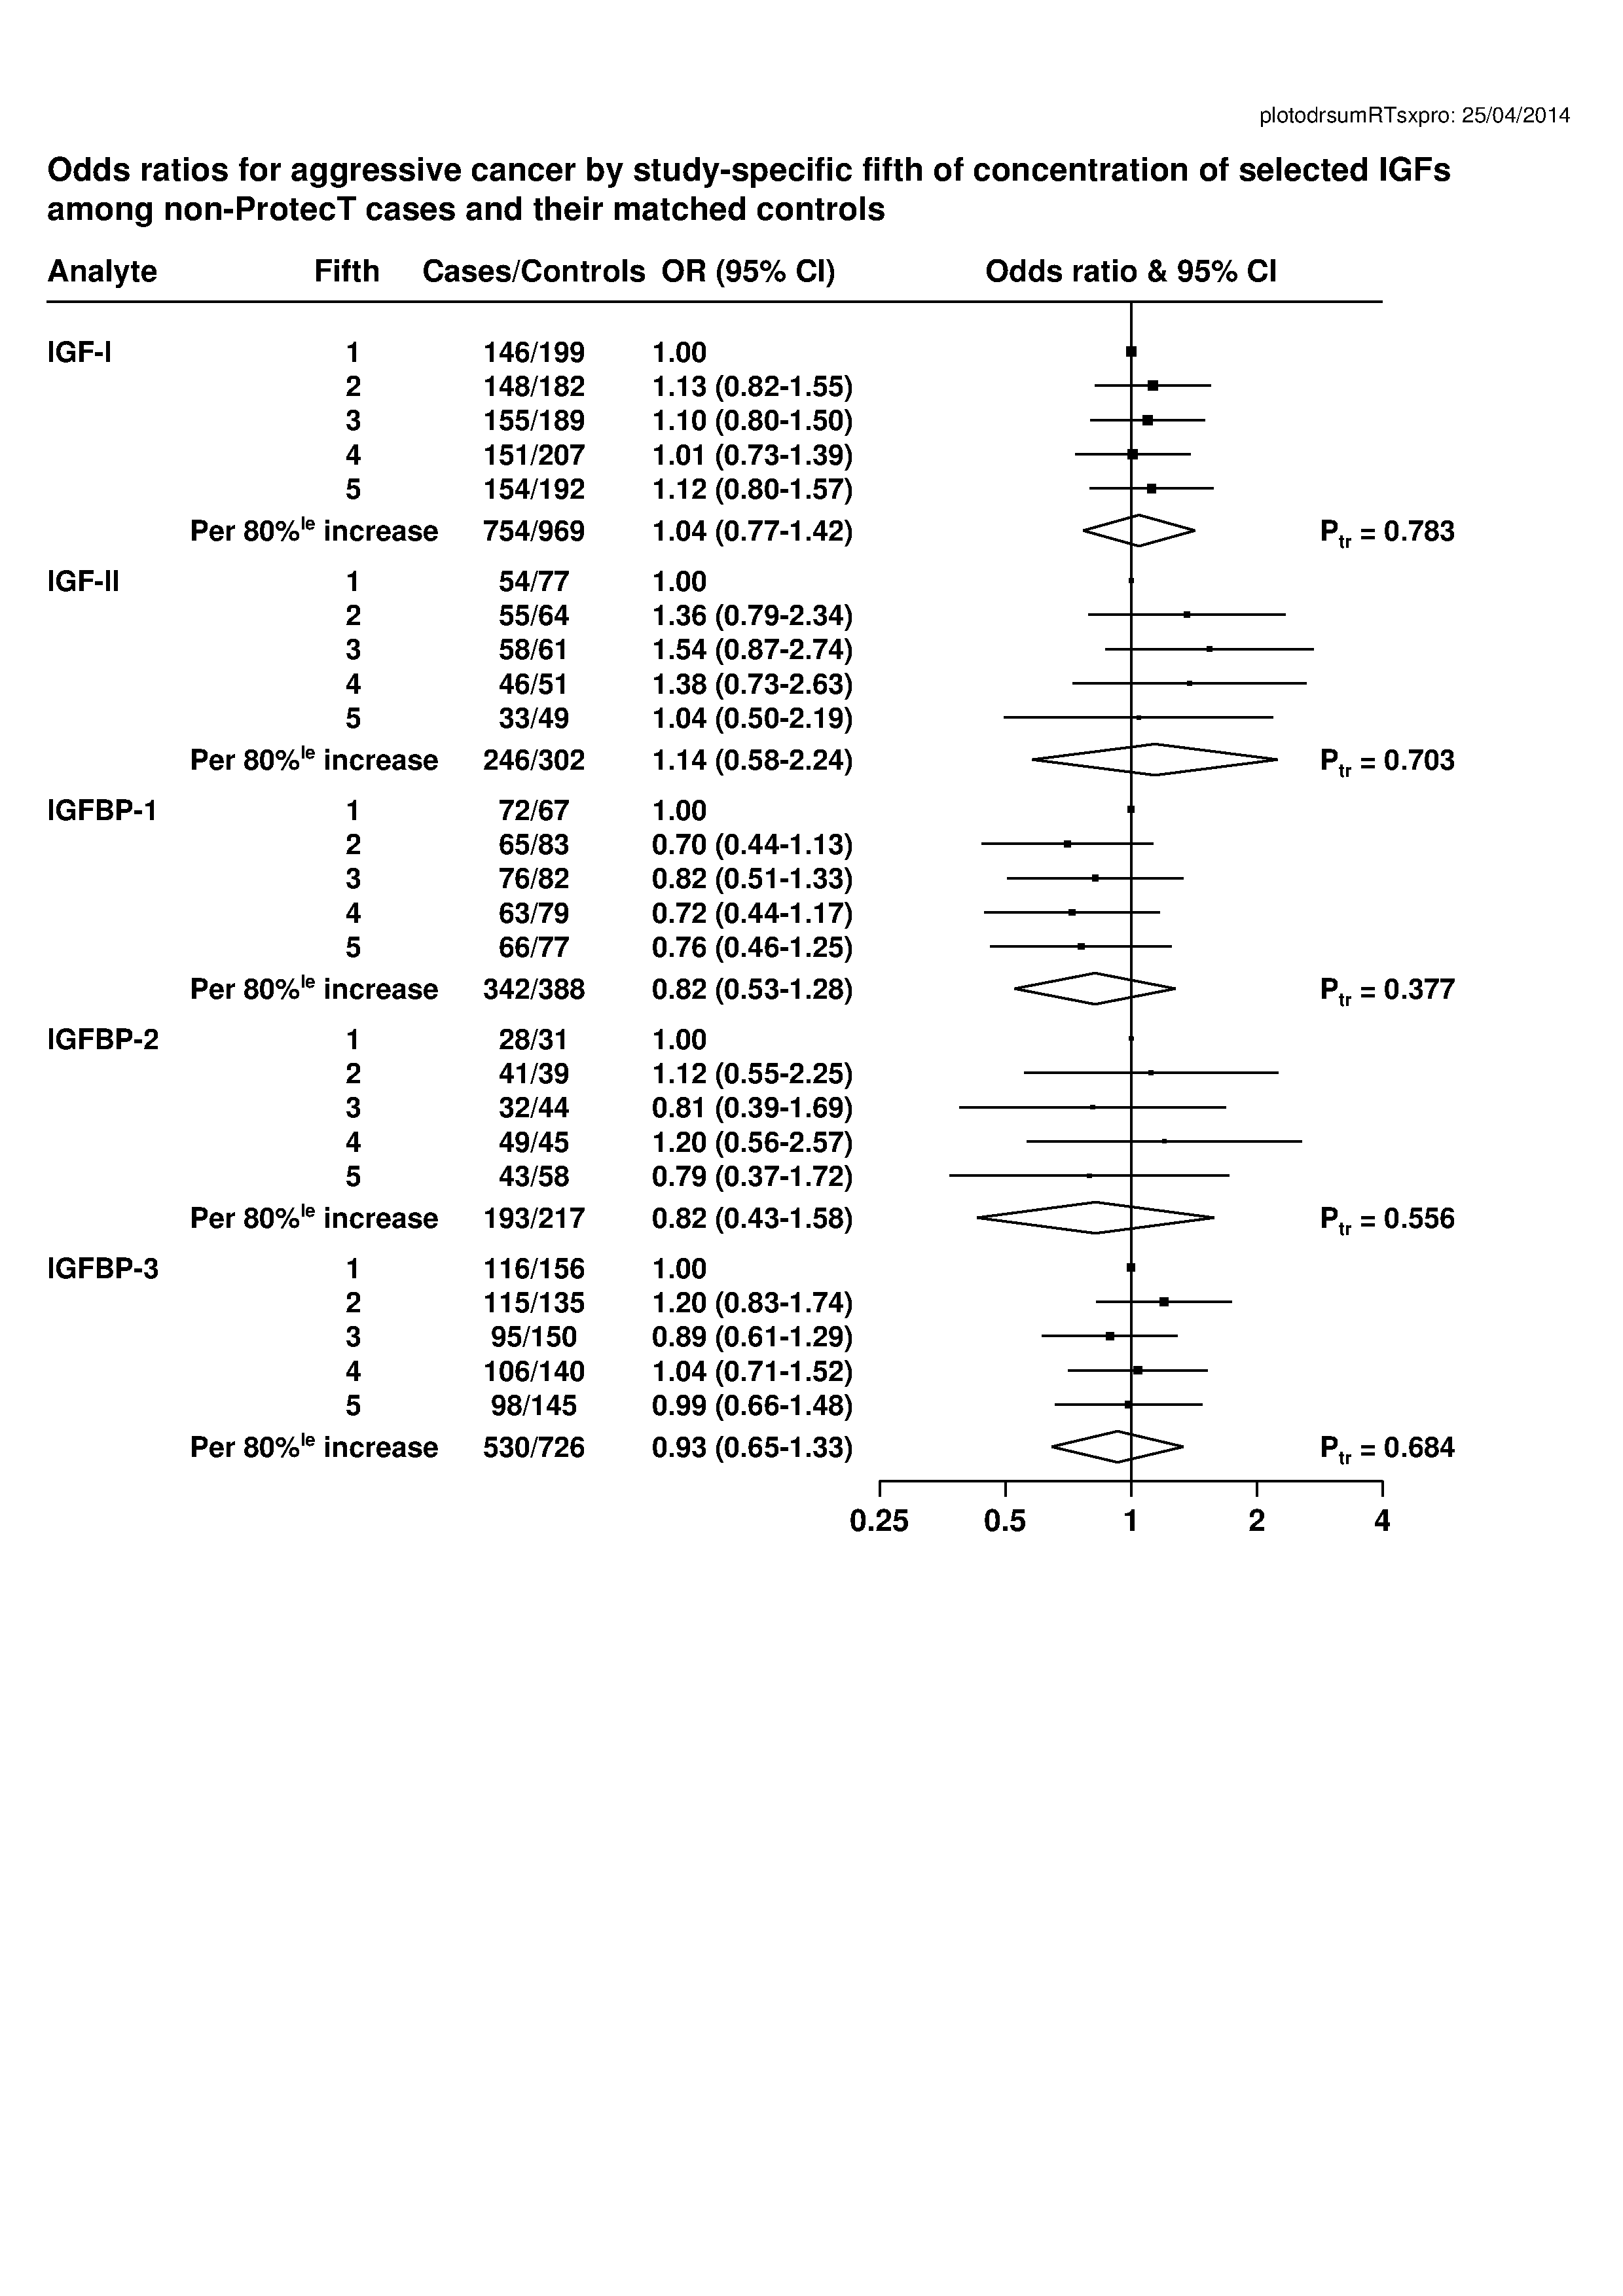
**

**Supplementary FigureS14. Odds ratios for prostate cancer by study-specific fifth of selected IGFs among all cases and their matched controls, adjusted for exact age, marital status, educational level, smoking status, height and BMI.**

**
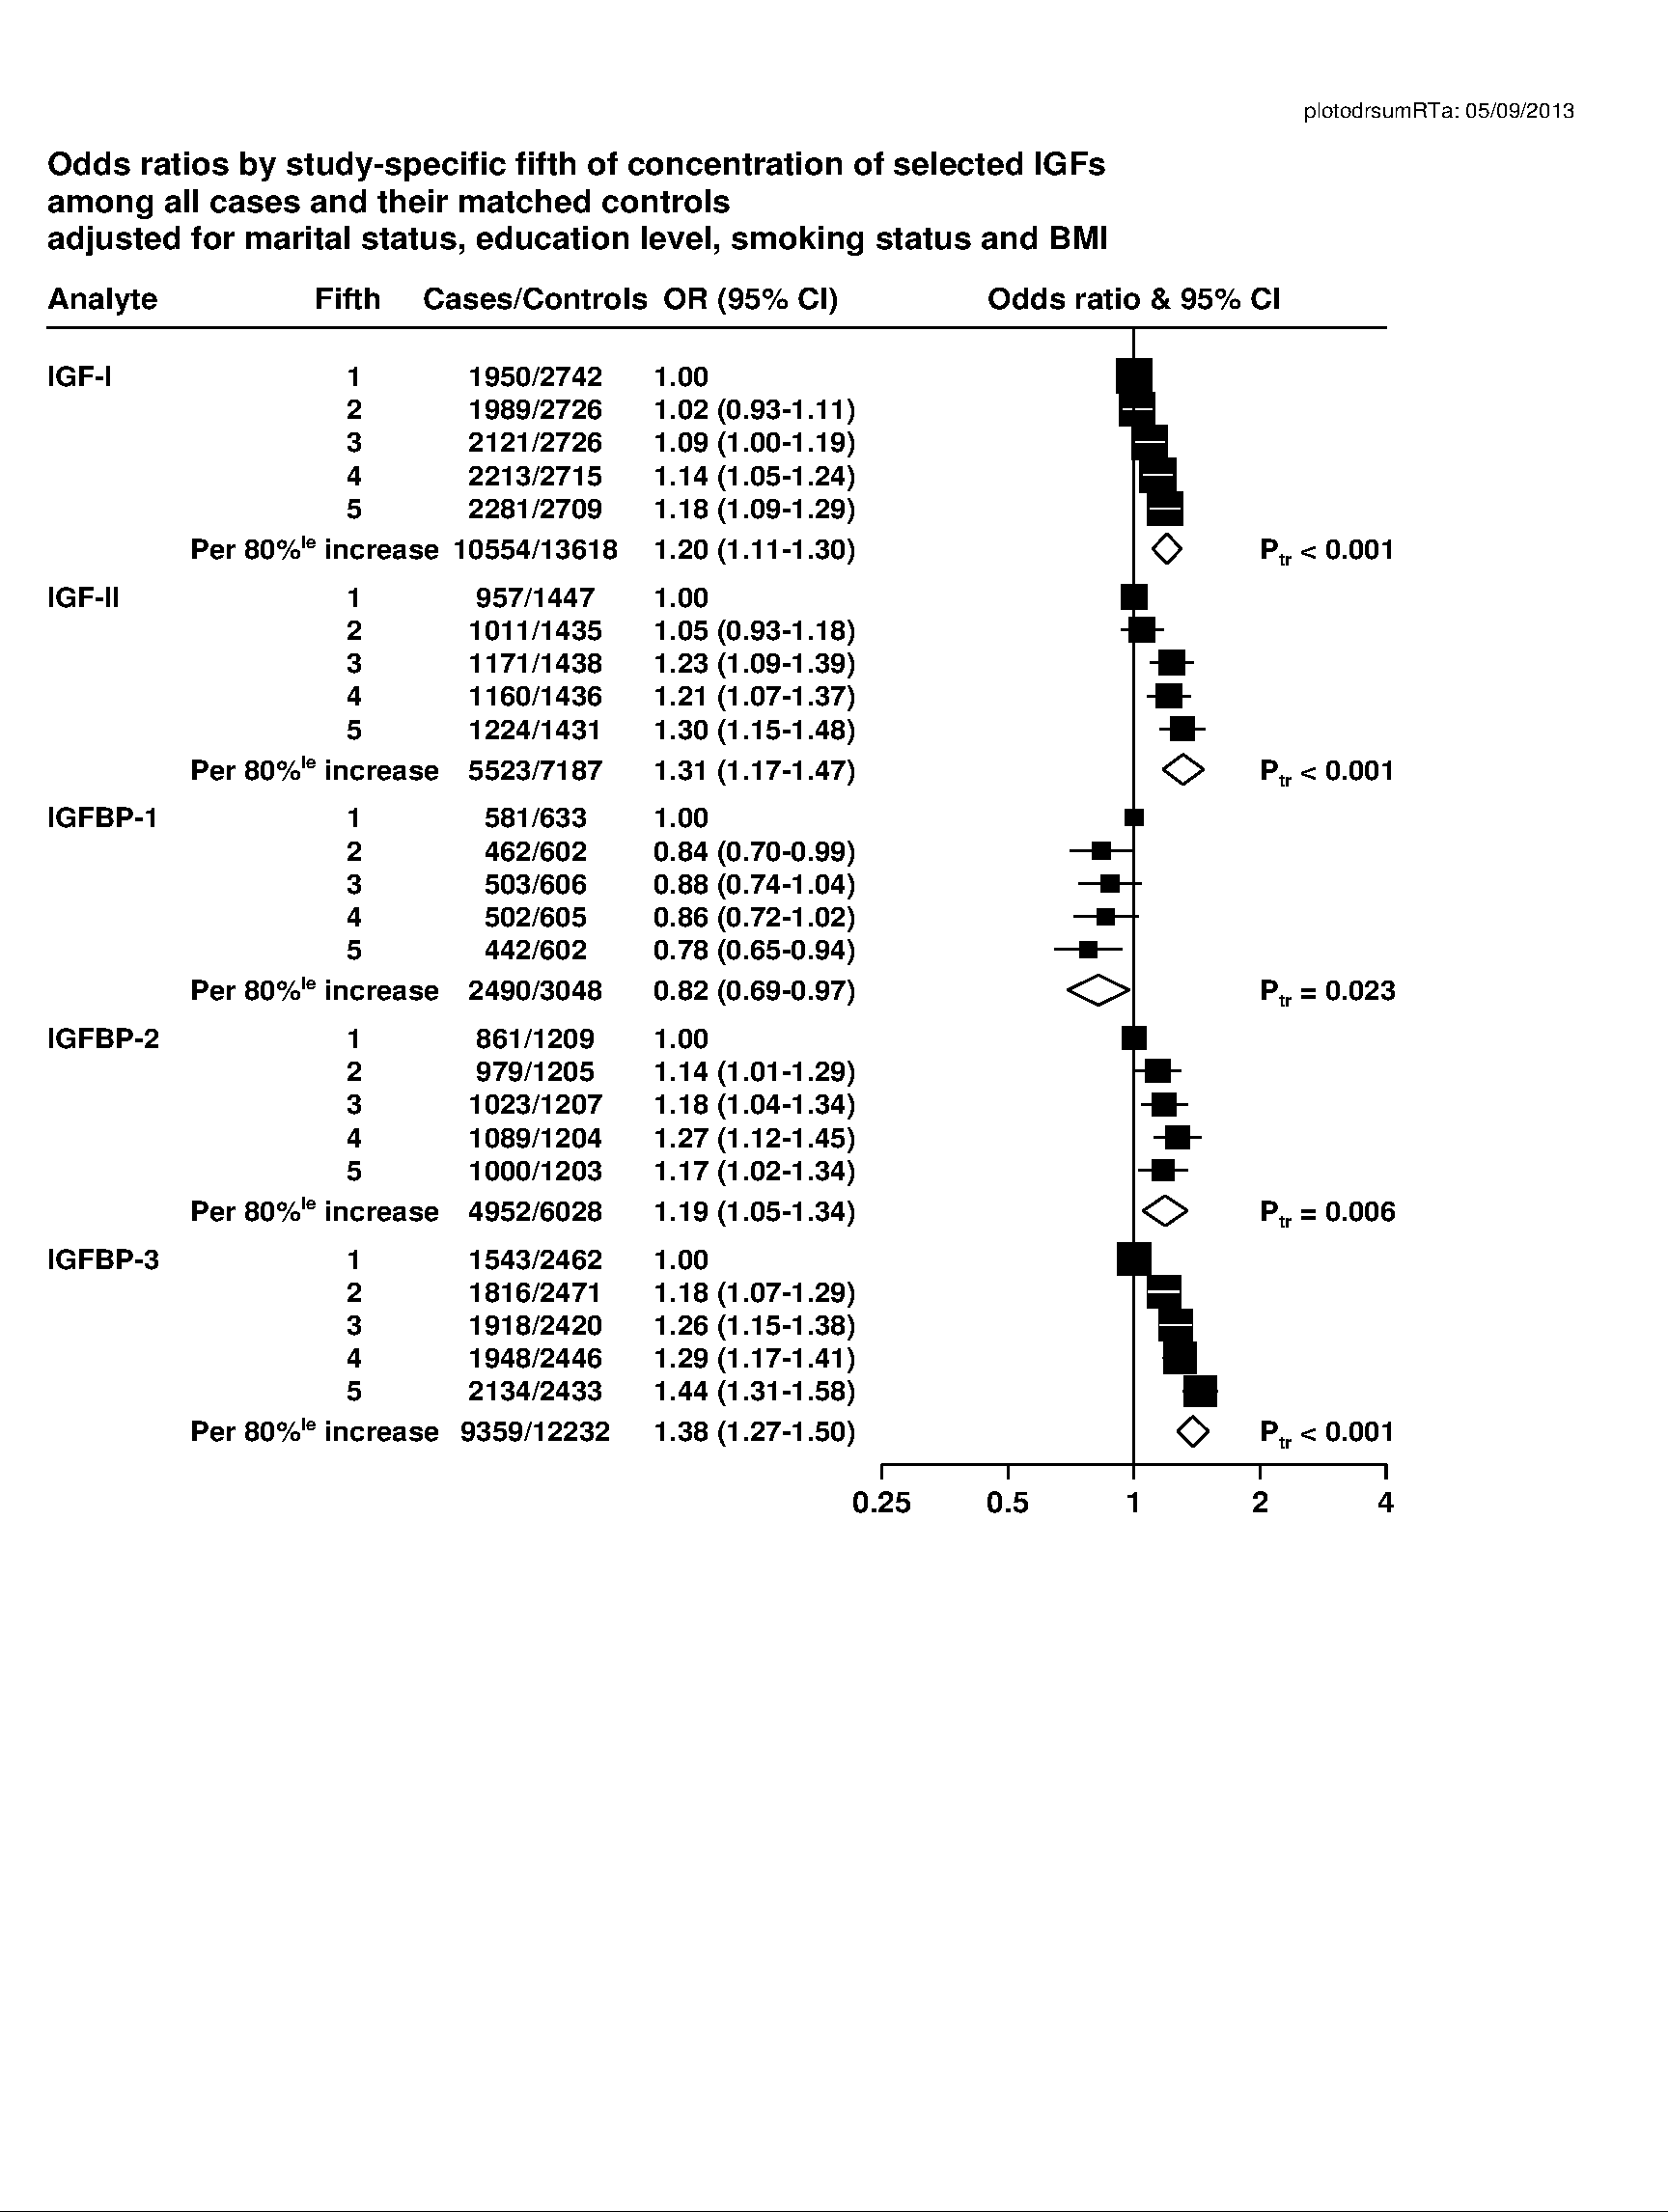
**

**Supplementary Figure S15. Odds ratios for prostate cancer by study-specific fifth of selected IGFs among cases and their matched controls in prospective studies, adjusted for exact age, marital status, educational level, smoking status, height and BMI.**

**
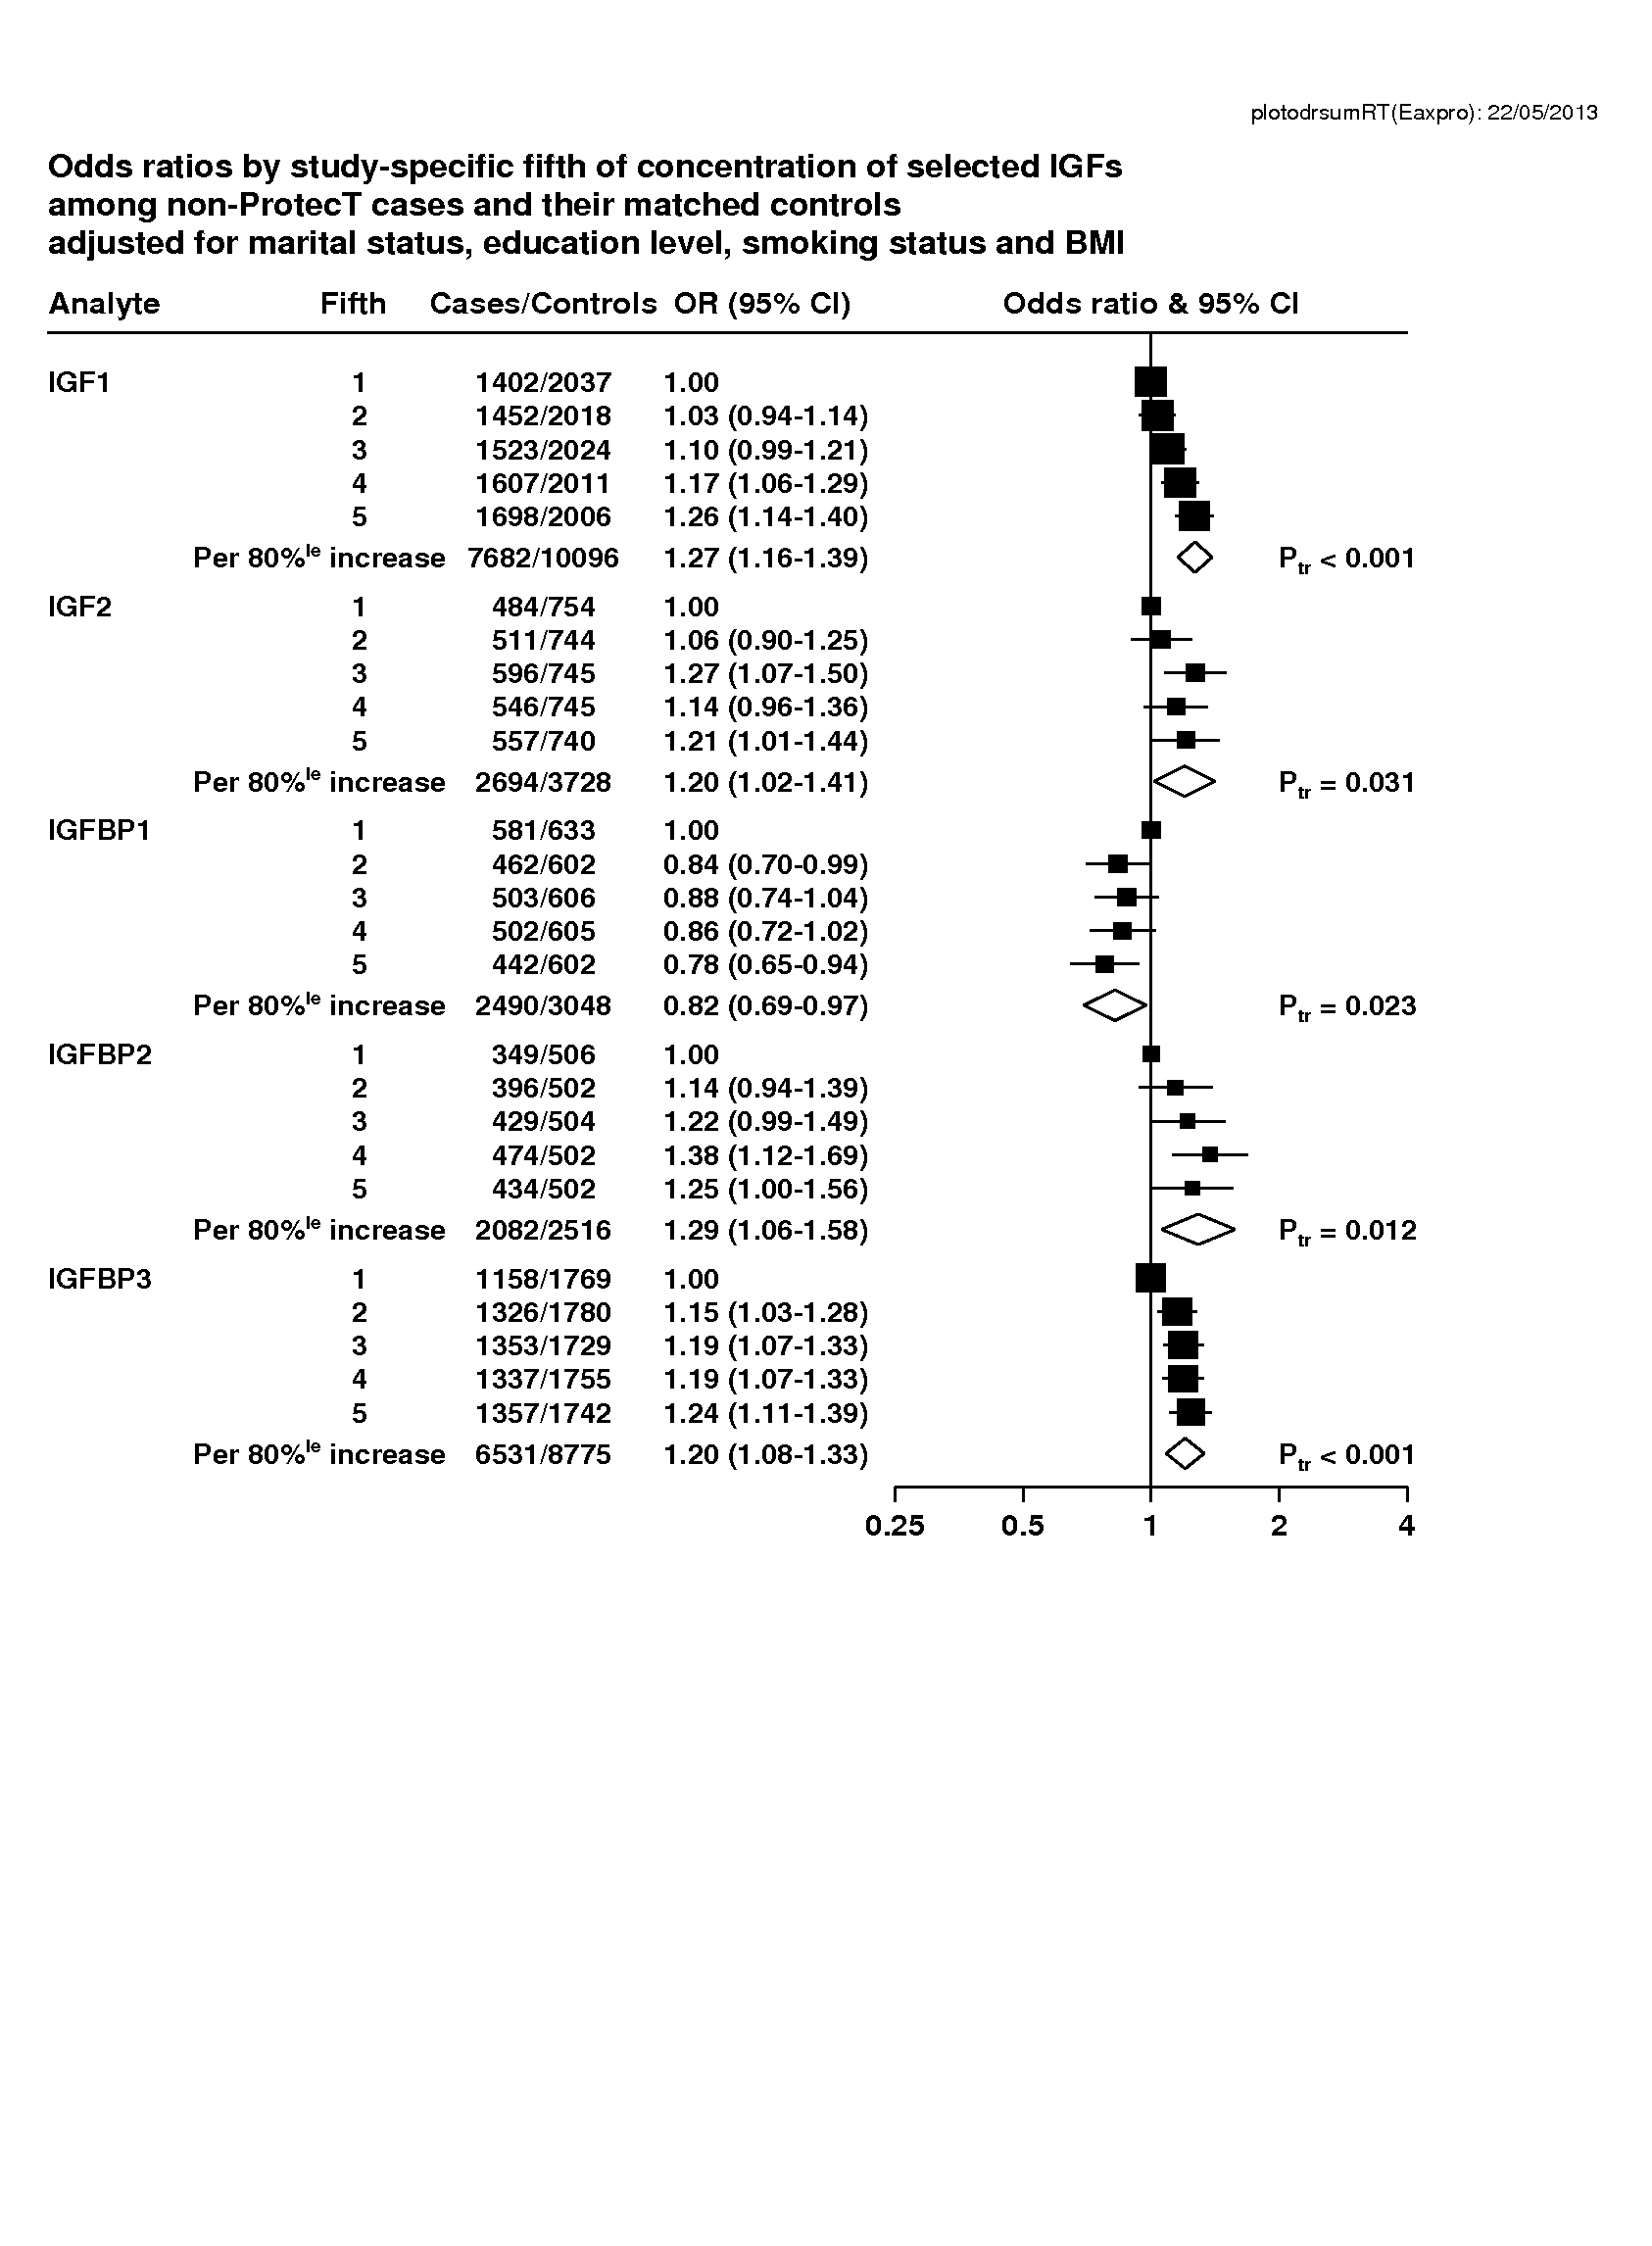
**
